# Supplementary material for: Low frequency variants associated with leukocyte telomere length in the Singapore Chinese population
Source: PubMed Central journal article supplement (PMC8093266; doi:10.1038/s42003-021-02056-7), 2021-05-03

| <b>Supplementary table 1:</b> Demographic information of study datasets. Data presented and mean (SD). |                     |                  |                |                   |               |               |
|--------------------------------------------------------------------------------------------------------|---------------------|------------------|----------------|-------------------|---------------|---------------|
|                                                                                                        | SCHS Discovery      | SCHS Replication | SCHS CAD cases | SCHS CAD controls | SMART2D       | DN            |
|                                                                                                        | N = 20,177          | N = 1,840        | N = 704        | N = 1,224         | N = 969       | N = 619       |
| Ethnicity                                                                                              | Singaporean Chinese |                  |                |                   |               |               |
| Age (years)                                                                                            | 55.06 (7.45)        | 54.99 (7.52)     | 59.54 (7.92)   | 59.05 (7.82)      | 58.68 (11.51) | 58.24 (12.25) |
| Male (%)                                                                                               | 44.57               | 37.94            | 64.68          | 62.95             | 54.75         | 60.57         |
| Smoking                                                                                                |                     |                  |                |                   |               |               |
| ever (%)                                                                                               | 10.92               | 9.54             | 14.04          | 15.80             | -             | -             |
| current (%)                                                                                            | 17.50               | 14.69            | 33.76          | 22.96             |               |               |
| LTL                                                                                                    | 1.02 (0.22)         | 1.05 (0.26)      | 1.00 (0.23)    | 1.02 (0.24)       | 0.71 (0.31)   | 0.85 (0.32)   |
| LTL: leucocyte telomere length                                                                         |                     |                  |                |                   |               |               |

**Supplementary table 2:** Sample QC procedures for the SCHS study samples.

|                                                         | SCHS Discovery | SCHS Replication | SCHS CAD                             |
|---------------------------------------------------------|----------------|------------------|--------------------------------------|
| Total samples genotyped                                 | 25,273         | 2,035            | 2,136                                |
| Samples with call-rate < 95%                            | 176            | 26               | 10                                   |
| Samples with extremes in heterozygosity (>3SD or <-3SD) | 236            | 22               | 20                                   |
| Cryptic related samples                                 | 2,902          | 26               | 67                                   |
| PCA outliers                                            | 287            | 33               | 36                                   |
| Samples pass QC                                         | 21,672         | 1,928            | 2,003                                |
| Samples with LTL data                                   | 20,231         | 1,844            | 1,933                                |
| Samples with extremes in LTL values (>3SD or <-3SD)     | 54             | 4                | 5                                    |
| Remaining samples                                       | 20,177         | 1,840            | 1,928 (704 cases and 1,224 controls) |

QC: quality control; SD: standard deviation.

| <b>Supplementary table 3:</b> SNP QC procedures in SCHS datasets.                          |                |                  |             |
|--------------------------------------------------------------------------------------------|----------------|------------------|-------------|
|                                                                                            | SCHS Discovery | SCHS Replication | SCHS CAD    |
| Total genotyped and imputed SNPs                                                           | 133,399,947    | 133,414,545      | 132,638,542 |
| Imputed SNPs with info score < 0.8                                                         | 97,180,890     | 115,201,908      | 115,885,324 |
| Imputed SNPs with HWE p-value < $10^{-6}$                                                  | 1,886          | 1,382            | 1,399       |
| Low frequency SNPs that passed QC (MAF between 0.05% -1%)                                  | 4,598,599      | 4,756,872        | 4,396,532   |
| Genomic inflation factor ( $\lambda$ )                                                     | 1.0098         | 1.0047           | 1.0025      |
| SNP: single nucleotide polymorphism; QC: quality control; HWE: Hardy-Weinberg equilibrium. |                |                  |             |

| <b>Supplementary table 4: LTL associated SNPs included in the weighted genetic risk score (wGRS).</b> |            |           |                 |             |                      |                       |
|-------------------------------------------------------------------------------------------------------|------------|-----------|-----------------|-------------|----------------------|-----------------------|
|                                                                                                       | Chromosome | Position  | Gene            | Effect size | Variance explained % | Source                |
| rs3219104                                                                                             | 1          | 226562621 | <i>PARP1</i>    | 0.074       | 0.330                | Dorajoo R et al. 2019 |
| rs11890390                                                                                            | 2          | 54485682  | <i>ACYP2</i>    | 0.040       | 0.130                | Dorajoo R et al. 2019 |
| rs55749605                                                                                            | 3          | 101232093 | <i>SENP7</i>    | 0.037       | 0.010                | Li C et al. 2020      |
| rs2293607                                                                                             | 3          | 169482335 | <i>TERC</i>     | 0.120       | 0.830                | Dorajoo R et al. 2019 |
| rs13137667                                                                                            | 4          | 71774347  | <i>MOB1B</i>    | 0.077       | 0.030                | Li C et al. 2020      |
| rs10857352                                                                                            | 4          | 164101482 | <i>NAF1</i>     | 0.064       | 0.150                | Dorajoo R et al. 2019 |
| rs7705526                                                                                             | 5          | 1285974   | <i>TERT</i>     | 0.118       | 0.800                | Dorajoo R et al. 2019 |
| rs2736176                                                                                             | 6          | 31587561  | <i>PRRC2A</i>   | 0.035       | 0.020                | Li C et al. 2020      |
| rs79314063                                                                                            | 7          | 124481168 | <i>POT1</i>     | 0.320       | 0.170                | Current Study         |
| rs7776744                                                                                             | 7          | 124599749 | <i>POT1</i>     | 0.058       | 0.170                | Dorajoo R et al. 2019 |
| rs79617270                                                                                            | 8          | 73978144  | <i>TERF1</i>    | 0.376       | 0.230                | Current Study         |
| rs7095953                                                                                             | 10         | 101274425 | <i>NKX2-3</i>   | 0.047       | 0.210                | Dorajoo R et al. 2019 |
| rs139620151                                                                                           | 10         | 105593428 | <i>STN1</i>     | 0.394       | 0.130                | Current Study         |
| rs227080                                                                                              | 11         | 108247888 | <i>ATM</i>      | 0.060       | 0.070                | Dorajoo R et al. 2019 |
| rs41293836                                                                                            | 14         | 24721327  | <i>TINF2</i>    | 0.233       | 0.840                | Dorajoo R et al. 2019 |
| rs2302588                                                                                             | 14         | 73404752  | <i>DCAF4</i>    | 0.042       | 0.030                | Dorajoo R et al. 2019 |
| rs3785074                                                                                             | 16         | 69406986  | <i>TERF2</i>    | 0.035       | 0.050                | Li C et al. 2020      |
| rs2967374                                                                                             | 16         | 82209861  | <i>MPHOSPH6</i> | 0.056       | 0.100                | Dorajoo R et al. 2019 |
| rs1001761                                                                                             | 18         | 662103    | <i>TYMS</i>     | 0.042       | 0.160                | Dorajoo R et al. 2019 |
| rs7253490                                                                                             | 19         | 22293706  | <i>ZNF257</i>   | 0.036       | 0.110                | Dorajoo R et al. 2019 |
| rs41309367                                                                                            | 20         | 62309554  | <i>RTEL1</i>    | 0.058       | 0.150                | Dorajoo R et al. 2019 |

**Supplementary table 5:** Association between rs34398311 in *POT1* gene locus and LTL, with and without adjusting for previously reported index SNP rs77767444.

|            | without adjustment for rs77767444 |       |                        | with adjustment for rs77767444 |       |                       |
|------------|-----------------------------------|-------|------------------------|--------------------------------|-------|-----------------------|
|            | beta                              | se    | P                      | beta                           | se    | P                     |
| rs34398311 | 0.135                             | 0.018 | $3.23 \times 10^{-13}$ | 0.084                          | 0.018 | $5.63 \times 10^{-6}$ |

**Supplementary table 6:** SNP based heritability of genome-wide SNPs, common SNPs and low-frequency SNPs among 2,863 1st degree related subjects from the SCHS study

| <b>Variants</b>                               | <b>SNP-based heritability</b> |
|-----------------------------------------------|-------------------------------|
| Common SNPs (MAF > 1%)                        | 0.187                         |
| Low frequency SNPs (MAF between 0.05% and 1%) | 0.029                         |
| Genome-wide SNPs (MAF > 0.05%)                | 0.206                         |

**Supplementary table 7:** Association between rs186524197/rs79314063 in *POT1* gene locus and LTL, before and after conditional probability analysis.

|             | Original association |       |                       | Conditional probability analysis |       |       |
|-------------|----------------------|-------|-----------------------|----------------------------------|-------|-------|
|             | beta                 | se    | P                     | beta                             | se    | P     |
| rs186524197 | -0.360               | 0.059 | $1.30 \times 10^{-9}$ | -0.154                           | 0.273 | 0.572 |
| rs79314063  | -0.345               | 0.057 | $1.12 \times 10^{-9}$ | -0.201                           | 0.260 | 0.440 |

In conditional probability analysis, rs79314063 was included in the association between LTL and rs186524197 as covariate and vice versa.

**Supplementary table 8:** Annotation of low frequency variants identified in the study.

| rsID        | chromosome | position  | nearest Gene    | distance | function   | CADD  | SIFT score | SIFT prediction | Polyphen2 HDIV score | Polyphen2 HDIV prediction | LRT score | LRT prediction | MutationTaster score | MutationTaster prediction | MutationAssessor score | MutationAssessor prediction      |
|-------------|------------|-----------|-----------------|----------|------------|-------|------------|-----------------|----------------------|---------------------------|-----------|----------------|----------------------|---------------------------|------------------------|----------------------------------|
| rs79314063  | 7          | 124481168 | <i>POT1</i>     | 0        | exonic     | 22.5  | 0.014      | Deleteriou      | 0.716                | Possibly damaging         | 0.114     | Neutral        | 0.882                | Disease causing           | 2.14                   | Predicted functional (M, medium) |
| rs186524197 | 7          | 124431653 | <i>GPR37</i>    | 25971    | intergenic | 0.05  | NA         | NA              | NA                   | NA                        | NA        | NA             | NA                   | NA                        | NA                     | NA                               |
| rs79617270  | 8          | 73978144  | <i>SBSPON</i>   | 0        | UTR3       | 10.45 | NA         | NA              | NA                   | NA                        | NA        | NA             | NA                   | NA                        | NA                     | NA                               |
| rs139620151 | 10         | 105593428 | <i>SH3PXD2A</i> | 0        | intronic   | 3.286 | NA         | NA              | NA                   | NA                        | NA        | NA             | NA                   | NA                        | NA                     | NA                               |

CADD: Combined Annotation Dependent Depletion.



**Supplementary table 9:** Solvent accessibility score of amino acids annotated in the OB-fold, described to stack the ssDNA (T1-G10) and binding to TPP1 for the wild type (wt) POT1 protein and for the putative POT1 proteins p.(D410H). Changes from exposed to buried sites (and vice versa) are highlighted in yellow.

|         | Position | Wildtype | p.(D410H) |
|---------|----------|----------|-----------|
| OB fold | 146      | Exposed  | Exposed   |
|         | 147      | Exposed  | Exposed   |
|         | 148      | Exposed  | Exposed   |
|         | 149      | Exposed  | Exposed   |
|         | 150      | Buried   | Buried    |
|         | 151      | Exposed  | Exposed   |
|         | 152      | Exposed  | Exposed   |
|         | T1; T2   | 62       | Buried    |
| A3; G4  | 89       | Buried   | Buried    |
| G5; G6  | 31       | Buried   | Buried    |
| T7      | 271      | Exposed  | Exposed   |
|         | 161      | Buried   | Buried    |
| T8; A9  | 245      | Exposed  | Exposed   |
|         | 266      | Buried   | Buried    |
|         | 223      | Buried   | Buried    |
| G10     | 330      | Exposed  | Exposed   |
|         | 331      | Exposed  | Exposed   |
|         | 332      | Exposed  | Exposed   |
|         | 333      | Exposed  | Exposed   |
|         | 334      | Buried   | Buried    |
|         | 335      | Exposed  | Exposed   |
|         | 336      | Exposed  | Buried    |
|         | 337      | Exposed  | Exposed   |
|         | 338      | Buried   | Buried    |
|         | 339      | Buried   | Buried    |
|         | 340      | Exposed  | Exposed   |
|         | 341      | Exposed  | Exposed   |
|         | 342      | Exposed  | Exposed   |
|         | 343      | Buried   | Buried    |
|         | 344      | Exposed  | Exposed   |
|         | 345      | Exposed  | Exposed   |
|         | 346      | Exposed  | Exposed   |
|         | 347      | Exposed  | Exposed   |
|         | 348      | Buried   | Buried    |
|         | 349      | Exposed  | Exposed   |
|         | 350      | Exposed  | Exposed   |
|         | 351      | Buried   | Buried    |
|         | 352      | Exposed  | Exposed   |
|         | 353      | Exposed  | Exposed   |
|         | 354      | Exposed  | Exposed   |
|         | 355      | Exposed  | Exposed   |
|         | 356      | Exposed  | Exposed   |
|         | 357      | Exposed  | Exposed   |
|         | 358      | Exposed  | Exposed   |

|             |         |
|-------------|---------|
| 359 Exposed | Exposed |
| 360 Buried  | Buried  |
| 361 Exposed | Exposed |
| 362 Buried  | Buried  |
| 363 Exposed | Exposed |
| 364 Buried  | Buried  |
| 365 Exposed | Exposed |
| 366 Buried  | Buried  |
| 367 Exposed | Exposed |
| 368 Exposed | Exposed |
| 369 Exposed | Exposed |
| 370 Exposed | Exposed |
| 371 Buried  | Buried  |
| 372 Exposed | Exposed |
| 373 Exposed | Exposed |
| 374 Buried  | Buried  |
| 375 Exposed | Exposed |
| 376 Exposed | Exposed |
| 377 Buried  | Buried  |
| 378 Buried  | Buried  |
| 379 Exposed | Exposed |
| 380 Exposed | Exposed |
| 381 Buried  | Buried  |
| 382 Buried  | Buried  |
| 383 Exposed | Exposed |
| 384 Exposed | Exposed |
| 385 Buried  | Buried  |
| 386 Exposed | Exposed |
| 387 Exposed | Exposed |
| 388 Buried  | Buried  |
| 389 Exposed | Exposed |
| 390 Exposed | Exposed |
| 391 Buried  | Exposed |
| 392 Exposed | Exposed |
| 393 Exposed | Exposed |
| 394 Exposed | Exposed |
| 395 Exposed | Exposed |
| 396 Buried  | Exposed |
| 397 Buried  | Buried  |
| 398 Exposed | Exposed |
| 399 Exposed | Buried  |
| 400 Buried  | Buried  |
| 401 Buried  | Buried  |
| 402 Exposed | Exposed |
| 403 Exposed | Exposed |
| 404 Buried  | Buried  |
| 405 Buried  | Buried  |
| 406 Exposed | Exposed |
| 407 Exposed | Exposed |
| 408 Exposed | Exposed |

|             |         |
|-------------|---------|
| 409 Exposed | Exposed |
| 410 Exposed | Exposed |
| 411 Exposed | Exposed |
| 412 Exposed | Exposed |
| 413 Buried  | Exposed |
| 414 Exposed | Exposed |
| 415 Exposed | Exposed |
| 416 Buried  | Buried  |
| 417 Buried  | Exposed |
| 418 Exposed | Buried  |
| 419 Buried  | Exposed |
| 420 Exposed | Exposed |
| 421 Exposed | Exposed |
| 422 Exposed | Exposed |
| 423 Exposed | Exposed |
| 424 Exposed | Exposed |
| 425 Exposed | Exposed |
| 426 Exposed | Exposed |
| 427 Exposed | Exposed |
| 428 Exposed | Exposed |
| 429 Exposed | Exposed |
| 430 Exposed | Exposed |
| 431 Exposed | Exposed |
| 432 Exposed | Exposed |
| 433 Exposed | Exposed |
| 434 Buried  | Buried  |
| 435 Buried  | Buried  |
| 436 Buried  | Buried  |
| 437 Exposed | Exposed |
| 438 Buried  | Buried  |
| 439 Buried  | Buried  |
| 440 Exposed | Buried  |
| 441 Exposed | Exposed |
| 442 Exposed | Exposed |
| 443 Exposed | Exposed |
| 444 Buried  | Buried  |
| 445 Exposed | Exposed |
| 446 Exposed | Exposed |
| 447 Exposed | Exposed |
| 448 Exposed | Exposed |
| 449 Exposed | Exposed |
| 450 Exposed | Exposed |
| 451 Buried  | Exposed |
| 452 Buried  | Buried  |
| 453 Buried  | Buried  |
| 454 Buried  | Buried  |
| 455 Buried  | Buried  |
| 456 Buried  | Buried  |
| 457 Buried  | Buried  |
| 458 Buried  | Buried  |

TPP1 binding

|             |         |
|-------------|---------|
| 459 Buried  | Buried  |
| 460 Buried  | Buried  |
| 461 Exposed | Exposed |
| 462 Exposed | Exposed |
| 463 Buried  | Buried  |
| 464 Buried  | Buried  |
| 465 Exposed | Exposed |
| 466 Buried  | Buried  |
| 467 Buried  | Buried  |
| 468 Exposed | Exposed |
| 469 Exposed | Exposed |
| 470 Buried  | Buried  |
| 471 Exposed | Exposed |
| 472 Exposed | Exposed |
| 473 Buried  | Buried  |
| 474 Buried  | Buried  |
| 475 Buried  | Buried  |
| 476 Buried  | Buried  |
| 477 Exposed | Exposed |
| 478 Exposed | Exposed |
| 479 Exposed | Exposed |
| 480 Exposed | Exposed |
| 481 Exposed | Exposed |
| 482 Exposed | Exposed |
| 483 Buried  | Buried  |
| 484 Exposed | Exposed |
| 485 Buried  | Buried  |
| 486 Buried  | Buried  |
| 487 Exposed | Exposed |
| 488 Buried  | Buried  |
| 489 Buried  | Buried  |
| 490 Buried  | Buried  |
| 491 Buried  | Buried  |
| 492 Buried  | Buried  |
| 493 Buried  | Buried  |
| 494 Buried  | Buried  |
| 495 Exposed | Exposed |
| 496 Buried  | Exposed |
| 497 Exposed | Exposed |
| 498 Buried  | Buried  |
| 499 Exposed | Exposed |
| 500 Exposed | Exposed |
| 501 Buried  | Buried  |
| 502 Buried  | Buried  |
| 503 Buried  | Buried  |
| 504 Exposed | Exposed |
| 505 Exposed | Exposed |
| 506 Buried  | Buried  |
| 507 Exposed | Exposed |
| 508 Exposed | Exposed |

|             |         |
|-------------|---------|
| 509 Exposed | Exposed |
| 510 Exposed | Exposed |
| 511 Exposed | Exposed |
| 512 Buried  | Buried  |
| 513 Exposed | Exposed |
| 514 Exposed | Exposed |
| 515 Buried  | Buried  |
| 516 Exposed | Exposed |
| 517 Exposed | Exposed |
| 518 Buried  | Buried  |
| 519 Exposed | Exposed |
| 520 Exposed | Exposed |
| 521 Exposed | Exposed |
| 522 Exposed | Exposed |
| 523 Exposed | Exposed |
| 524 Exposed | Exposed |
| 525 Exposed | Exposed |
| 526 Exposed | Exposed |
| 527 Exposed | Exposed |
| 528 Exposed | Exposed |
| 529 Buried  | Buried  |
| 530 Buried  | Buried  |
| 531 Exposed | Exposed |
| 532 Exposed | Exposed |
| 533 Exposed | Exposed |
| 534 Buried  | Exposed |
| 535 Buried  | Buried  |
| 536 Exposed | Exposed |
| 537 Exposed | Exposed |
| 538 Buried  | Buried  |
| 539 Exposed | Exposed |
| 540 Buried  | Buried  |
| 541 Buried  | Buried  |
| 542 Buried  | Buried  |
| 543 Buried  | Buried  |
| 544 Buried  | Buried  |
| 545 Exposed | Exposed |
| 546 Buried  | Buried  |
| 547 Exposed | Exposed |
| 548 Buried  | Buried  |
| 549 Exposed | Exposed |
| 550 Exposed | Exposed |
| 551 Buried  | Buried  |
| 552 Exposed | Exposed |
| 553 Exposed | Buried  |
| 554 Exposed | Exposed |
| 555 Buried  | Buried  |
| 556 Exposed | Exposed |
| 557 Buried  | Buried  |
| 558 Buried  | Buried  |

|             |         |
|-------------|---------|
| 559 Buried  | Buried  |
| 560 Exposed | Exposed |
| 561 Exposed | Exposed |
| 562 Buried  | Buried  |
| 563 Exposed | Exposed |
| 564 Exposed | Exposed |
| 565 Buried  | Buried  |
| 566 Buried  | Buried  |
| 567 Exposed | Exposed |
| 568 Buried  | Buried  |
| 569 Exposed | Exposed |
| 570 Buried  | Buried  |
| 571 Exposed | Exposed |
| 572 Exposed | Exposed |
| 573 Buried  | Buried  |
| 574 Buried  | Buried  |
| 575 Buried  | Exposed |
| 576 Exposed | Exposed |
| 577 Exposed | Exposed |
| 578 Exposed | Exposed |
| 579 Buried  | Buried  |
| 580 Buried  | Buried  |
| 581 Exposed | Exposed |
| 582 Exposed | Exposed |
| 583 Buried  | Buried  |
| 584 Exposed | Exposed |
| 585 Exposed | Exposed |
| 586 Buried  | Buried  |
| 587 Buried  | Buried  |
| 588 Exposed | Exposed |
| 589 Exposed | Exposed |
| 590 Buried  | Buried  |
| 591 Buried  | Buried  |
| 592 Exposed | Buried  |
| 593 Exposed | Exposed |
| 594 Exposed | Exposed |
| 595 Exposed | Exposed |
| 596 Exposed | Exposed |
| 597 Buried  | Buried  |
| 598 Exposed | Exposed |
| 599 Exposed | Exposed |
| 600 Exposed | Exposed |
| 601 Buried  | Buried  |
| 602 Buried  | Buried  |
| 603 Buried  | Buried  |
| 604 Exposed | Buried  |
| 605 Buried  | Buried  |
| 606 Buried  | Buried  |
| 607 Buried  | Buried  |
| 608 Exposed | Exposed |

|  |             |         |
|--|-------------|---------|
|  | 609 Buried  | Buried  |
|  | 610 Buried  | Buried  |
|  | 611 Exposed | Exposed |
|  | 612 Buried  | Buried  |
|  | 613 Exposed | Exposed |
|  | 614 Exposed | Exposed |
|  | 615 Exposed | Exposed |
|  | 616 Exposed | Exposed |
|  | 617 Exposed | Exposed |
|  | 618 Exposed | Exposed |
|  | 619 Exposed | Exposed |
|  | 620 Buried  | Buried  |
|  | 621 Buried  | Buried  |
|  | 622 Buried  | Buried  |
|  | 623 Exposed | Exposed |
|  | 624 Buried  | Buried  |
|  | 625 Buried  | Buried  |
|  | 626 Exposed | Exposed |
|  | 627 Buried  | Buried  |
|  | 628 Exposed | Buried  |
|  | 629 Buried  | Buried  |
|  | 630 Buried  | Buried  |
|  | 631 Exposed | Exposed |
|  | 632 Exposed | Exposed |
|  | 633 Buried  | Buried  |
|  | 634 Exposed | Exposed |

**Supplementary table 10:** Summary statistics of LTL association for low frequency variants identified within the SCHS Discovery dataset adjusted for the genotypes of the reported common index variants using conditional probability analysis.

| Chr | Rare variant genome-wide hits |           |       | Common variant genome-wide hits |           |       | $r^2$ | Beta   | Se    | P                     |
|-----|-------------------------------|-----------|-------|---------------------------------|-----------|-------|-------|--------|-------|-----------------------|
|     | SNP                           | Position  | MAF   | SNP                             | Position  | MAF   |       |        |       |                       |
| 7   | rs79314063                    | 124481168 | 0.008 | rs7776744                       | 124599749 | 0.422 | 0.065 | -0.347 | 0.066 | $1.70 \times 10^{-7}$ |
| 8   | rs79617270                    | 73978144  | 0.008 | rs28365964                      | 73920883  | 0.017 | 0.664 | 0.206  | 0.076 | 0.007                 |
| 10  | rs139620151                   | 105593428 | 0.006 | rs12415148                      | 105680586 | 0.058 | 0.248 | 0.183  | 0.077 | 0.017                 |

Chr: Chromosome; MAF: Minor allele frequency.



| <b>Supplementary table 11:</b> Summary statistics of novel low frequency SNPs and previously identified common index SNPs in the SCHS Discovery dataset. |                         |     |           |               |       |        |       |                        |
|----------------------------------------------------------------------------------------------------------------------------------------------------------|-------------------------|-----|-----------|---------------|-------|--------|-------|------------------------|
| SNP                                                                                                                                                      | Remarks                 | Chr | Position  | Effect allele | EAF   | beta   | se    | P                      |
| rs79314063                                                                                                                                               | Novel low frequency SNP | 7   | 124481168 | G             | 0.008 | -0.345 | 0.057 | $1.12 \times 10^{-9}$  |
| rs7776744                                                                                                                                                | Common SNP              | 7   | 124599749 | G             | 0.578 | -0.065 | 0.010 | $9.76 \times 10^{-12}$ |
| rs79617270                                                                                                                                               | Novel low frequency SNP | 8   | 73978144  | G             | 0.008 | 0.385  | 0.054 | $8.63 \times 10^{-13}$ |
| rs28365964                                                                                                                                               | Common SNP              | 8   | 73920883  | C             | 0.017 | 0.284  | 0.038 | $3.46 \times 10^{-14}$ |
| rs139620151                                                                                                                                              | Novel low frequency SNP | 10  | 105593428 | A             | 0.006 | 0.384  | 0.067 | $1.10 \times 10^{-8}$  |
| rs12415148                                                                                                                                               | Common SNP              | 10  | 105680586 | C             | 0.058 | 0.220  | 0.020 | $4.70 \times 10^{-26}$ |

**Supplementary table 12:** Significant 3D chromatin interaction mapping identified for rs79617270 and rs139620151.

| region 1               | region 2               | FDR                    | type | Database | tissue/cell           | SNPs        | genes               |
|------------------------|------------------------|------------------------|------|----------|-----------------------|-------------|---------------------|
| 8:73960001-74000000    | 8:72720001-72760000    | $5.34 \times 10^{-12}$ | HiC  | GSE87112 | Mesenchymal_Stem_Cell | rs79617270  | <i>MSC-AS1, MSC</i> |
| 8:73960001-74000000    | 8:73440001-73480000    | $2.30 \times 10^{-12}$ | HiC  | GSE87112 | Mesenchymal_Stem_Cell | rs79617270  | <i>KCNB2</i>        |
| 8:73960001-74000000    | 8:73440001-73480000    | $7.73 \times 10^{-9}$  | HiC  | GSE87112 | Mesendoderm           | rs79617270  | <i>KCNB2</i>        |
| 8:73960001-74000000    | 8:74000001-74040000    | $3.30 \times 10^{-9}$  | HiC  | GSE87112 | Left_Ventricle        | rs79617270  | <i>SBSPON</i>       |
| 8:73960001-74000000    | 8:74000001-74040000    | $6.93 \times 10^{-8}$  | HiC  | GSE87112 | Liver                 | rs79617270  | <i>SBSPON</i>       |
| 8:73960001-74000000    | 8:74000001-74040000    | $5.34 \times 10^{-11}$ | HiC  | GSE87112 | GM12878               | rs79617270  | <i>SBSPON</i>       |
| 8:73960001-74000000    | 8:74000001-74040000    | $1.77 \times 10^{-16}$ | HiC  | GSE87112 | IMR90                 | rs79617270  | <i>SBSPON</i>       |
| 8:73960001-74000000    | 8:74000001-74040000    | $2.46 \times 10^{-60}$ | HiC  | GSE87112 | Mesenchymal_Stem_Cell | rs79617270  | <i>SBSPON</i>       |
| 8:73960001-74000000    | 8:74000001-74040000    | $1.87 \times 10^{-44}$ | HiC  | GSE87112 | Mesendoderm           | rs79617270  | <i>SBSPON</i>       |
| 8:73960001-74000000    | 8:74000001-74040000    | $1.24 \times 10^{-28}$ | HiC  | GSE87112 | Trophoblast-like_Cell | rs79617270  | <i>SBSPON</i>       |
| 8:73960001-74000000    | 8:74000001-74040000    | $1.49 \times 10^{-97}$ | HiC  | GSE87112 | hESC                  | rs79617270  | <i>SBSPON</i>       |
| 8:73960001-74000000    | 8:73920001-73960000    | $5.94 \times 10^{-9}$  | HiC  | GSE87112 | GM12878               | rs79617270  | <i>TERF1</i>        |
| 8:73960001-74000000    | 8:73920001-73960000    | $6.50 \times 10^{-42}$ | HiC  | GSE87112 | Mesenchymal_Stem_Cell | rs79617270  | <i>TERF1</i>        |
| 8:73960001-74000000    | 8:73920001-73960000    | $1.14 \times 10^{-70}$ | HiC  | GSE87112 | Mesendoderm           | rs79617270  | <i>TERF1</i>        |
| 8:73960001-74000000    | 8:73920001-73960000    | $2.78 \times 10^{-15}$ | HiC  | GSE87112 | Trophoblast-like_Cell | rs79617270  | <i>TERF1</i>        |
| 8:73960001-74000000    | 8:73920001-73960000    | $1.10 \times 10^{-36}$ | HiC  | GSE87112 | hESC                  | rs79617270  | <i>TERF1</i>        |
| 8:73960001-74000000    | 8:75200001-75240000    | $2.24 \times 10^{-8}$  | HiC  | GSE87112 | IMR90                 | rs79617270  | <i>JPH1, GDAP1</i>  |
| 8:73960001-74000000    | 8:72960001-73000000    | $8.77 \times 10^{-10}$ | HiC  | GSE87112 | Mesenchymal_Stem_Cell | rs79617270  | <i>TRPA1</i>        |
| 10:105560001-105600000 | 10:105640001-105680000 | $2.06 \times 10^{-7}$  | HiC  | GSE87112 | IMR90                 | rs139620151 | <i>STN1/OBFC1</i>   |
| 10:105560001-105600000 | 10:105600001-105640000 | $2.39 \times 10^{-14}$ | HiC  | GSE87112 | IMR90                 | rs139620151 | <i>SH3PXD2A</i>     |
| 10:105560001-105600000 | 10:106000001-106040000 | $3.99 \times 10^{-7}$  | HiC  | GSE87112 | IMR90                 | rs139620151 | <i>GSTO2</i>        |

Region 1: One end of a significant interaction overlapping with one of the candidate SNPs; FDR: false discovery rate.

**Supplementary table 13:** Summary statistics of association between low frequency index variants and LTL in individual dataset at replication stage.

|             | Chromosome | Position  | TA | SCHS Replication |        |       |       | SCHS CAD cases |        |       |       | SCHS CAD controls |        |       |       | SMART2D |        |       |       | DN      |        |       |       | Replication meta-analysis |       |       |
|-------------|------------|-----------|----|------------------|--------|-------|-------|----------------|--------|-------|-------|-------------------|--------|-------|-------|---------|--------|-------|-------|---------|--------|-------|-------|---------------------------|-------|-------|
|             |            |           |    | N = 1,840        |        |       |       | N = 704        |        |       |       | N = 1,224         |        |       |       | N = 969 |        |       |       | N = 619 |        |       |       | N = 5,356                 |       |       |
|             |            |           |    | TAF              | beta   | se    | P     | TAF            | beta   | se    | P     | TAF               | beta   | se    | P     | TAF     | beta   | se    | P     | TAF     | beta   | se    | P     | beta                      | se    | P     |
| rs79314063  | 7          | 124481168 | G  | 0.008            | -0.105 | 0.170 | 0.536 | 0.006          | -0.272 | 0.363 | 0.454 | 0.002             | -0.404 | 0.306 | 0.187 | 0.002   | -0.194 | 0.487 | 0.691 | 0.002   | -0.264 | 0.971 | 0.785 | -0.191                    | 0.131 | 0.146 |
| rs79617270  | 8          | 73978144  | G  | 0.009            | 0.325  | 0.168 | 0.052 | 0.006          | 0.030  | 0.390 | 0.938 | 0.0004            | 0.785  | 0.310 | 0.011 | 0.005   | 0.054  | 0.327 | 0.868 | 0.004   | 0.297  | 0.485 | 0.541 | 0.328                     | 0.123 | 0.008 |
| rs139620151 | 10         | 105593428 | A  | 0.002            | 0.106  | 0.431 | 0.807 | 0.006          | 0.584  | 0.340 | 0.085 | 0.006             | 0.493  | 0.257 | 0.055 | 0.003   | 0.270  | 0.437 | 0.536 | 0.003   | 0.825  | 0.558 | 0.140 | 0.456                     | 0.163 | 0.005 |

TA: test allele; TAF: test allele frequency.

**Supplementary table 14:** Summary statistics of association between low frequency index variants and LTL in SingHEART/Biobank.

|             |            |                        |           |               | N = 154 |         |          |
|-------------|------------|------------------------|-----------|---------------|---------|---------|----------|
| rsid        | chromosome | Gene                   | Position  | Effect allele | beta    | se      | <i>P</i> |
| rs79314063  | 7          | <i>POT1</i>            | 124481168 | G             | -587    | 339.584 | 0.090    |
| rs79617270  | 8          | <i>TERF1 / SBSPON</i>  | 73978144  | G             | 370     | 221.063 | 0.100    |
| rs139620151 | 10         | <i>STN1 / SH3PXD2A</i> | 105593428 | A             | 1239    | 471.185 | 0.009    |

Beta showed the base pair change of telomere length per effect allele.

**Supplementary table 15:** Association of identified SNPs with LTL after further adjustment for smoking status (never smokers or ex-smokers vs current).

| SNP         | Chr | Position | Gene                   | TA | TAF   | SCHS Discovery |       |                        | SCHS CAD |       |       | SCHS Replication |       |       | Meta-analysis |       |                        |                   |
|-------------|-----|----------|------------------------|----|-------|----------------|-------|------------------------|----------|-------|-------|------------------|-------|-------|---------------|-------|------------------------|-------------------|
|             |     |          |                        |    |       | Beta           | Se    | P                      | Beta     | Se    | P     | Beta             | Se    | P     | Beta          | Se    | P                      | Q <sub>pval</sub> |
| rs79314063  | 7   | 1.24E+08 | <i>POT1</i>            | G  | 0.007 | -0.345         | 0.057 | $1.06 \times 10^{-9}$  | -0.262   | 0.456 | 0.566 | -0.099           | 0.169 | 0.557 | -0.319        | 0.053 | $1.97 \times 10^{-9}$  | 0.384             |
| rs79617270  | 8   | 73978144 | <i>TERF1 / SBSPON</i>  | G  | 0.008 | 0.384          | 0.054 | $9.10 \times 10^{-13}$ | 0.494    | 0.268 | 0.050 | 0.326            | 0.168 | 0.052 | 0.383         | 0.050 | $2.73 \times 10^{-14}$ | 0.865             |
| rs139620151 | 10  | 1.06E+08 | <i>STN1 / SH3PXD2A</i> | A  | 0.006 | 0.383          | 0.067 | $1.09 \times 10^{-8}$  | 0.486    | 0.257 | 0.058 | 0.110            | 0.431 | 0.799 | 0.384         | 0.064 | $2.23 \times 10^{-9}$  | 0.755             |

**Supplementary table 16:** Replication of previously reported LTL rare variants in *ATM* and *RPL8* gene region, first identified in European population samples

|             | Chromosome | Position  | Nearest Gene        | Effect allele | MAF    | Beta                       | Se    | P     |
|-------------|------------|-----------|---------------------|---------------|--------|----------------------------|-------|-------|
| rs144114619 | 6          | 26408145  | <i>BTN3A1</i>       |               |        | Monomorphic in East Asians |       |       |
| rs763648407 | 8          | 146017753 | <i>RPL8</i>         | A             | 0.006  | -0.066                     | 0.068 | 0.332 |
| rs185270276 | 11         | 108263828 | <i>C11orf65</i>     | C             | 0.015  | 0.060                      | 0.038 | 0.122 |
| rs12365364  | 11         | 108004687 | <i>ACAT1</i>        | A             | 0.015  | 0.058                      | 0.039 | 0.135 |
| rs79119325  | 11         | 108032614 | <i>NPAT</i>         |               |        | Monomorphic in East Asians |       |       |
| rs3092910   | 11         | 108180917 | <i>ATM,C11orf65</i> | C             | 0.016  | 0.049                      | 0.038 | 0.196 |
| rs3218711   | 11         | 108236264 | <i>ATM,C11orf65</i> | G             | 0.016  | 0.052                      | 0.038 | 0.168 |
| rs11212668  | 11         | 108352576 | <i>KDELC2</i>       | C             | 0.015  | 0.071                      | 0.039 | 0.066 |
| rs12146512  | 11         | 108384666 | <i>EXPH5</i>        |               |        | Monomorphic in East Asians |       |       |
| rs2234993   | 11         | 108129599 | <i>ATM</i>          | G             | 0.015  | 0.051                      | 0.038 | 0.176 |
| rs3218670   | 11         | 108186743 | <i>ATM</i>          | A             | 0.0009 | -0.496                     | 0.167 | 0.003 |

**Supplementary table 17:** Top ten signals in group-wise gene burden tests (CMC and Zeggini gene burden tests).

| Gene         | Range                                                                                   | CMC                   |                  |                                              |                  | Zeggini               |                       |                                              |                  |
|--------------|-----------------------------------------------------------------------------------------|-----------------------|------------------|----------------------------------------------|------------------|-----------------------|-----------------------|----------------------------------------------|------------------|
|              |                                                                                         | Original association  |                  | Exclude lead SNP in the region from analysis |                  | Original association  |                       | Exclude lead SNP in the region from analysis |                  |
|              |                                                                                         | P                     | P <sub>adj</sub> | P                                            | P <sub>adj</sub> | P                     | P <sub>adj</sub>      | P                                            | P <sub>adj</sub> |
| POT1         | 7:124462439-124570037,7:124462439-124570037,7:124462439-124570037,7:124462439-124570037 | $1.82 \times 10^{-6}$ | 0.029            | 0.434                                        | 1.000            | $4.23 \times 10^{-8}$ | $6.73 \times 10^{-4}$ | 0.403                                        | 1.000            |
| KIF12        | 9:116853917-116861337                                                                   | $1.26 \times 10^{-4}$ | 1.000            | -                                            | -                | $1.26 \times 10^{-4}$ | 1.000                 | -                                            | -                |
| KIAA0825     | 5:93854917-93954309,5:93486555-93954309                                                 | $1.42 \times 10^{-4}$ | 1.000            | -                                            | -                | $1.42 \times 10^{-4}$ | 1.000                 | -                                            | -                |
| RBM25        | 14:73525220-73588076                                                                    | $3.18 \times 10^{-4}$ | 1.000            | -                                            | -                | $3.18 \times 10^{-4}$ | 1.000                 | -                                            | -                |
| ZNF518B      | 4:10441503-10459032                                                                     | $3.61 \times 10^{-4}$ | 1.000            | -                                            | -                | $3.32 \times 10^{-4}$ | 1.000                 | -                                            | -                |
| PSMD6        | 3:63996230-64009120                                                                     | $3.74 \times 10^{-4}$ | 1.000            | -                                            | -                | $3.74 \times 10^{-4}$ | 1.000                 | -                                            | -                |
| P4HA2        | 5:131528303-131563556,5:131528303-131562935,5:131528303-131563556,5:131528303-131562935 | $4.03 \times 10^{-4}$ | 1.000            | -                                            | -                | $4.03 \times 10^{-4}$ | 1.000                 | -                                            | -                |
| UNC119       | 17:26873724-26879646,17:26873724-26879646                                               | $4.53 \times 10^{-4}$ | 1.000            | -                                            | -                | $4.53 \times 10^{-4}$ | 1.000                 | -                                            | -                |
| LOC100130522 | 18:77905806-77929616,18:77905806-77936315                                               | $4.83 \times 10^{-4}$ | 1.000            | -                                            | -                | $4.83 \times 10^{-4}$ | 1.000                 | -                                            | -                |
| PKP4         | 2:159313475-159537940,2:159313475-159537940                                             | $6.72 \times 10^{-4}$ | 1.000            | -                                            | -                | -                     | -                     | -                                            | -                |
| PGLYRP4      | 1:153302596-153321022                                                                   | -                     | -                | -                                            | -                | $2.96 \times 10^{-4}$ | 1.000                 | -                                            | -                |

Gene region showed level of significance after adjusting for multiple comparison was further analyzed by excluding the lead SNP in the region.

**Supplementary table 18:** Association of LTL associated low frequency variants with coronary artery disease in the SCHS CAD dataset.

|     | Case/Non-Case | rs79314063  |                      |       |                  | rs79617270  |                      |       |                  | rs139620151 |                      |       |                  |
|-----|---------------|-------------|----------------------|-------|------------------|-------------|----------------------|-------|------------------|-------------|----------------------|-------|------------------|
|     |               | Test allele | HR (95% CI)          | P     | P <sub>adj</sub> | Test allele | HR (95% CI)          | P     | P <sub>adj</sub> | Test allele | HR (95% CI)          | P     | P <sub>adj</sub> |
| CAD | 711 / 1,246   | G           | 1.835 (0.820, 4.104) | 0.140 | 0.420            | G           | 0.844 (0.350, 2.036) | 0.844 | 1.000            | A           | 1.098 (0.546, 2.206) | 0.793 | 1.000            |

P<sub>adj</sub>: score test P adjusted for 3 tests; HR: hazard ratio; CI: confidence interval.



| <b>Supplementary table 19: Effect of SNP and wGRS on incident cancer mediated through LTL in SCHS.</b> |               |       |                       |                 |       |                       |              |       |                       |                                 |  |
|--------------------------------------------------------------------------------------------------------|---------------|-------|-----------------------|-----------------|-------|-----------------------|--------------|-------|-----------------------|---------------------------------|--|
|                                                                                                        | Direct effect |       |                       | Indirect effect |       |                       | Total effect |       |                       | Proportion mediated through LTL |  |
|                                                                                                        | Beta          | Se    | P                     | Beta            | Se    | P                     | Beta         | Se    | P                     |                                 |  |
| Colon cancer                                                                                           |               |       |                       |                 |       |                       |              |       |                       |                                 |  |
| rs79617270                                                                                             | 0.921         | 0.288 | 0.001                 | 0.046           | 0.022 | 0.041                 | 0.967        | 0.287 | 0.001                 | 4.76%                           |  |
| Lung cancer                                                                                            |               |       |                       |                 |       |                       |              |       |                       |                                 |  |
| wGRS                                                                                                   | 0.071         | 0.026 | 0.007                 | 0.012           | 0.006 | 0.038                 | 0.083        | 0.025 | 0.001                 | 14.40%                          |  |
| Lung adenocarcinoma                                                                                    |               |       |                       |                 |       |                       |              |       |                       |                                 |  |
| wGRS                                                                                                   | 0.095         | 0.036 | 0.009                 | 0.031           | 0.008 | $1.18 \times 10^{-4}$ | 0.126        | 0.035 | $3.60 \times 10^{-4}$ | 24.92%                          |  |
| Lung cancer                                                                                            |               |       |                       |                 |       |                       |              |       |                       |                                 |  |
| rs7705526                                                                                              | 0.267         | 0.069 | $9.74 \times 10^{-5}$ | 0.015           | 0.006 | 0.015                 | 0.283        | 0.068 | $3.62 \times 10^{-5}$ | 5.47%                           |  |
| wGRS: weighted genetic risk score; LTL: leukocyte telomere length.                                     |               |       |                       |                 |       |                       |              |       |                       |                                 |  |

**Supplementary table 20:** Association of individual LTL SNPs with major incident cancers in the SCHS.

|            | Chromosome | Position  | Gene            | Effect size | Colon cancer            |       |                  | Rectal cancer            |       |                  | Lung cancer              |                         |                  | Breast cancer            |       |                  |
|------------|------------|-----------|-----------------|-------------|-------------------------|-------|------------------|--------------------------|-------|------------------|--------------------------|-------------------------|------------------|--------------------------|-------|------------------|
|            |            |           |                 |             | 405 case/21531 non-case |       |                  | 249 case /21531 non-case |       |                  | 496 case /21531 non-case |                         |                  | 335 case /12112 non-case |       |                  |
|            |            |           |                 |             | HR (95% CI)             | P     | P <sub>adj</sub> | HR (95% CI)              | P     | P <sub>adj</sub> | HR (95% CI)              | P                       | P <sub>adj</sub> | HR (95% CI)              | P     | P <sub>adj</sub> |
| rs3219104  | 1          | 226562621 | <i>PARP1</i>    | 0.074       | 1.010 (0.880, 1.160)    | 0.882 | 1.000            | 1.030 (0.864, 1.228)     | 0.740 | 1.000            | 0.947 (0.837, 1.072)     | 0.390                   | 1.000            | 0.984 (0.845, 1.147)     | 0.840 | 1.000            |
| rs11890390 | 2          | 54485682  | <i>ACYP2</i>    | 0.040       | 0.954 (0.794, 1.145)    | 0.611 | 1.000            | 1.005 (0.799, 1.262)     | 0.968 | 1.000            | 0.992 (0.843, 1.166)     | 0.920                   | 1.000            | 0.902 (0.735, 1.107)     | 0.324 | 1.000            |
| rs55749605 | 3          | 101232093 | <i>SENP7</i>    | 0.037       | 1.016 (0.881, 1.170)    | 0.831 | 1.000            | 0.986 (0.823, 1.183)     | 0.883 | 1.000            | 0.902 (0.792, 1.028)     | 0.121                   | 1.000            | 1.121 (0.961, 1.308)     | 0.147 | 1.000            |
| rs13137667 | 4          | 71774347  | <i>MOB1B</i>    | 0.077       | 1.026 (0.713, 1.477)    | 0.888 | 1.000            | 0.862 (0.562, 1.320)     | 0.494 | 1.000            | 1.089 (0.778, 1.525)     | 0.620                   | 1.000            | 0.925 (0.629, 1.359)     | 0.690 | 1.000            |
| rs2293607  | 3          | 169482335 | <i>TERC</i>     | 0.120       | 0.985 (0.857, 1.131)    | 0.828 | 1.000            | 1.072 (0.898, 1.279)     | 0.444 | 1.000            | 1.227 (1.082, 1.391)     | 0.001                   | 0.101            | 1.074 (0.923, 1.249)     | 0.357 | 1.000            |
| rs10857352 | 4          | 164101482 | <i>NAF1</i>     | 0.064       | 1.033 (0.881, 1.210)    | 0.691 | 1.000            | 0.916 (0.753, 1.115)     | 0.383 | 1.000            | 1.113 (0.961, 1.288)     | 0.153                   | 1.000            | 1.227 (1.023, 1.472)     | 0.028 | 1.000            |
| rs7705526  | 5          | 1285974   | <i>TERT</i>     | 0.118       | 1.086 (0.945, 1.249)    | 0.245 | 1.000            | 1.016 (0.850, 1.215)     | 0.859 | 1.000            | 1.273 (1.124, 1.442)     | 1.40 × 10 <sup>-4</sup> | 0.010            | 1.202 (1.033, 1.399)     | 0.017 | 1.000            |
| rs2736176  | 6          | 31587561  | <i>PRRC2A</i>   | 0.035       | 1.072 (0.926, 1.241)    | 0.350 | 1.000            | 1.121 (0.931, 1.349)     | 0.227 | 1.000            | 1.009 (0.883, 1.153)     | 0.898                   | 1.000            | 0.930 (0.787, 1.098)     | 0.389 | 1.000            |
| rs7776744  | 7          | 124599749 | <i>POT1</i>     | 0.058       | 1.078 (0.939, 1.239)    | 0.285 | 1.000            | 1.021 (0.855, 1.219)     | 0.819 | 1.000            | 1.004 (0.885, 1.138)     | 0.957                   | 1.000            | 0.892 (0.764, 1.042)     | 0.150 | 1.000            |
| rs7095953  | 10         | 101274425 | <i>NKX2-3</i>   | 0.047       | 1.019 (0.886, 1.173)    | 0.788 | 1.000            | 0.879 (0.736, 1.049)     | 0.154 | 1.000            | 1.042 (0.918, 1.182)     | 0.528                   | 1.000            | 0.819 (0.703, 0.954)     | 0.010 | 0.755            |
| rs227080   | 11         | 108247888 | <i>ATM</i>      | 0.060       | 1.106 (0.959, 1.276)    | 0.166 | 1.000            | 1.033 (0.862, 1.237)     | 0.727 | 1.000            | 0.995 (0.877, 1.129)     | 0.936                   | 1.000            | 1.065 (0.911, 1.245)     | 0.429 | 1.000            |
| rs41293836 | 14         | 24721327  | <i>TINF2</i>    | 0.233       | 1.034 (0.802, 1.332)    | 0.799 | 1.000            | 1.043 (0.755, 1.443)     | 0.797 | 1.000            | 1.034 (0.821, 1.302)     | 0.778                   | 1.000            | 1.043 (0.792, 1.373)     | 0.763 | 1.000            |
| rs2302588  | 14         | 73404752  | <i>DCAF4</i>    | 0.042       | 1.014 (0.857, 1.200)    | 0.873 | 1.000            | 0.754 (0.595, 0.957)     | 0.020 | 1.000            | 1.020 (0.875, 1.188)     | 0.801                   | 1.000            | 1.113 (0.929, 1.332)     | 0.246 | 1.000            |
| rs3785074  | 16         | 69406986  | <i>TERF2</i>    | 0.035       | 1.013 (0.794, 1.291)    | 0.919 | 1.000            | 0.957 (0.695, 1.316)     | 0.785 | 1.000            | 0.939 (0.749, 1.179)     | 0.589                   | 1.000            | 0.933 (0.707, 1.232)     | 0.625 | 1.000            |
| rs2967374  | 16         | 82209861  | <i>MPHOSPH6</i> | 0.056       | 1.064 (0.883, 1.284)    | 0.513 | 1.000            | 0.954 (0.744, 1.222)     | 0.707 | 1.000            | 0.924 (0.774, 1.104)     | 0.384                   | 1.000            | 1.004 (0.814, 1.238)     | 0.972 | 1.000            |
| rs1001761  | 18         | 662103    | <i>TYMS</i>     | 0.042       | 1.026 (0.881, 1.195)    | 0.738 | 1.000            | 1.029 (0.847, 1.250)     | 0.777 | 1.000            | 0.870 (0.754, 1.005)     | 0.058                   | 1.000            | 0.838 (0.705, 0.997)     | 0.046 | 1.000            |
| rs7253490  | 19         | 22293706  | <i>ZNF257</i>   | 0.036       | 1.076 (0.932, 1.243)    | 0.318 | 1.000            | 0.928 (0.769, 1.120)     | 0.435 | 1.000            | 1.057 (0.928, 1.204)     | 0.406                   | 1.000            | 0.990 (0.843, 1.164)     | 0.907 | 1.000            |
| rs41309367 | 20         | 62309554  | <i>RTEL1</i>    | 0.058       | 1.080 (0.922, 1.266)    | 0.338 | 1.000            | 0.897 (0.739, 1.088)     | 0.268 | 1.000            | 0.997 (0.866, 1.147)     | 0.963                   | 1.000            | 0.948 (0.801, 1.124)     | 0.541 | 1.000            |

P<sub>adj</sub>: score test P adjusted for 72 tests; HR: hazard ratio; CI: confidence interval.

**Supplementary Figure 1.** Correlation of imputed common biallelic SNPs (MAF > 1%) frequencies between the two combined reference panels (the cosmopolitan 1000 Genomes reference panels, Phase 3 and local Singapore population specific reference panels) and 1000 Genomes East-Asian reference populations.

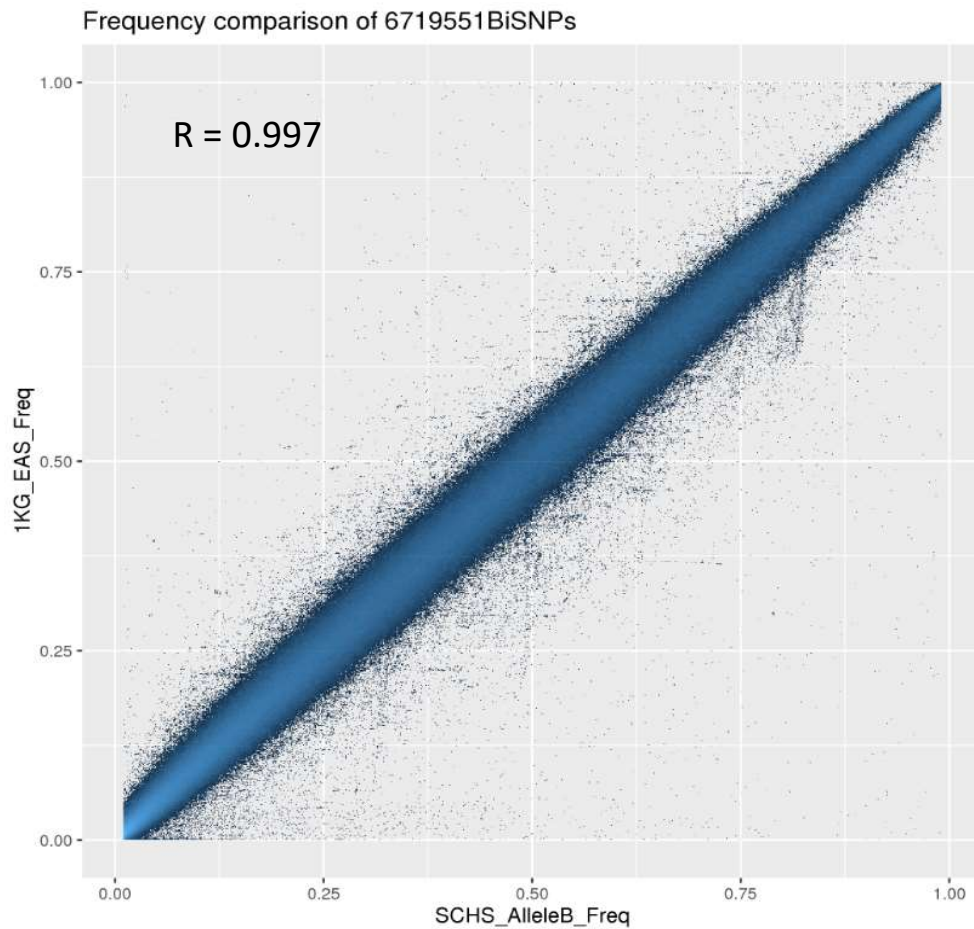

**Supplementary Figure 2.** LTL associations for common variants utilizing the two panel imputation procedure in the SCHS discovery dataset. **a.** All 10 genome-wide hits previously reported were recapitulated [1]. **b.** QQ-plot of observed compared

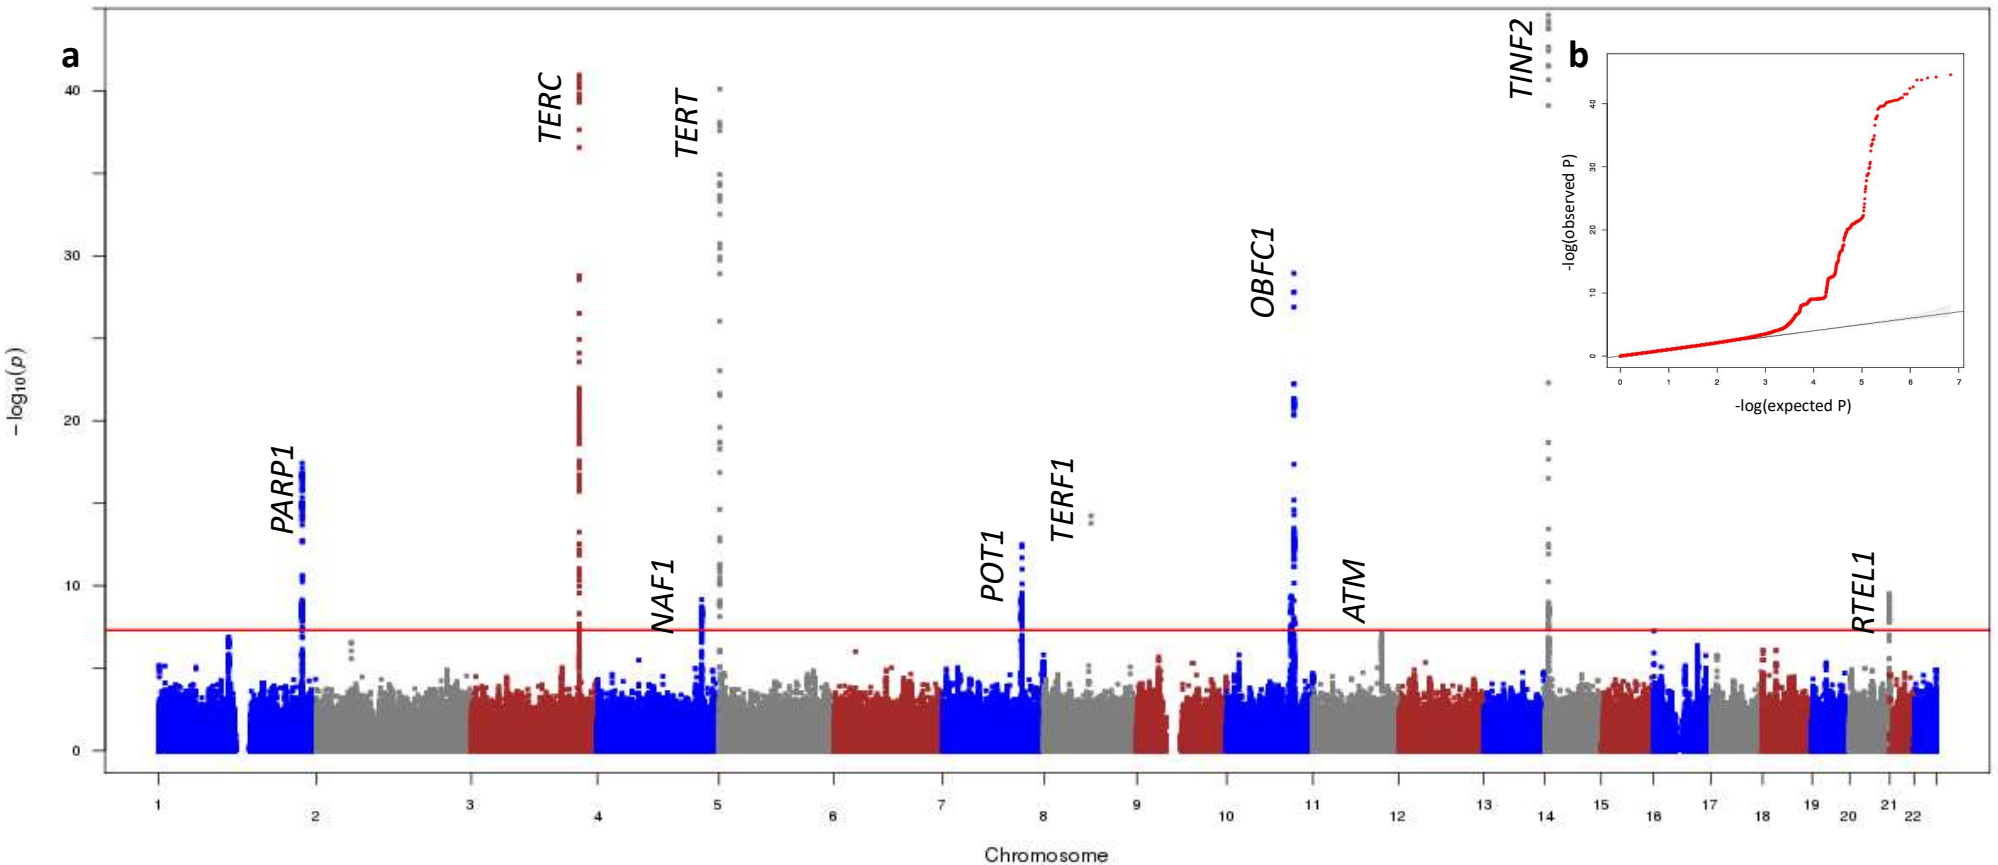

1. Dorajoo, R., X. Chang, R.L. Gurung, et al., *Loci for human leukocyte telomere length in the Singaporean Chinese population and trans-ethnic genetic studies*. Nature communications, 2019. **10**(1): p. 2491 DOI: 10.1038/s41467-019-10443-2.

**Supplementary Figure 3.** Regional common SNP associations at loci reported the same index SNP [1]. **a.** *TERT* (rs7705526, chr5) **b.** *TINF2* (rs41293836, chr14) and **c.** *RTEL1* (rs41309367, chr20). Plots plotted using LocusZoom (<http://csg.sph.umich.edu/locuszoom/>).

**a**

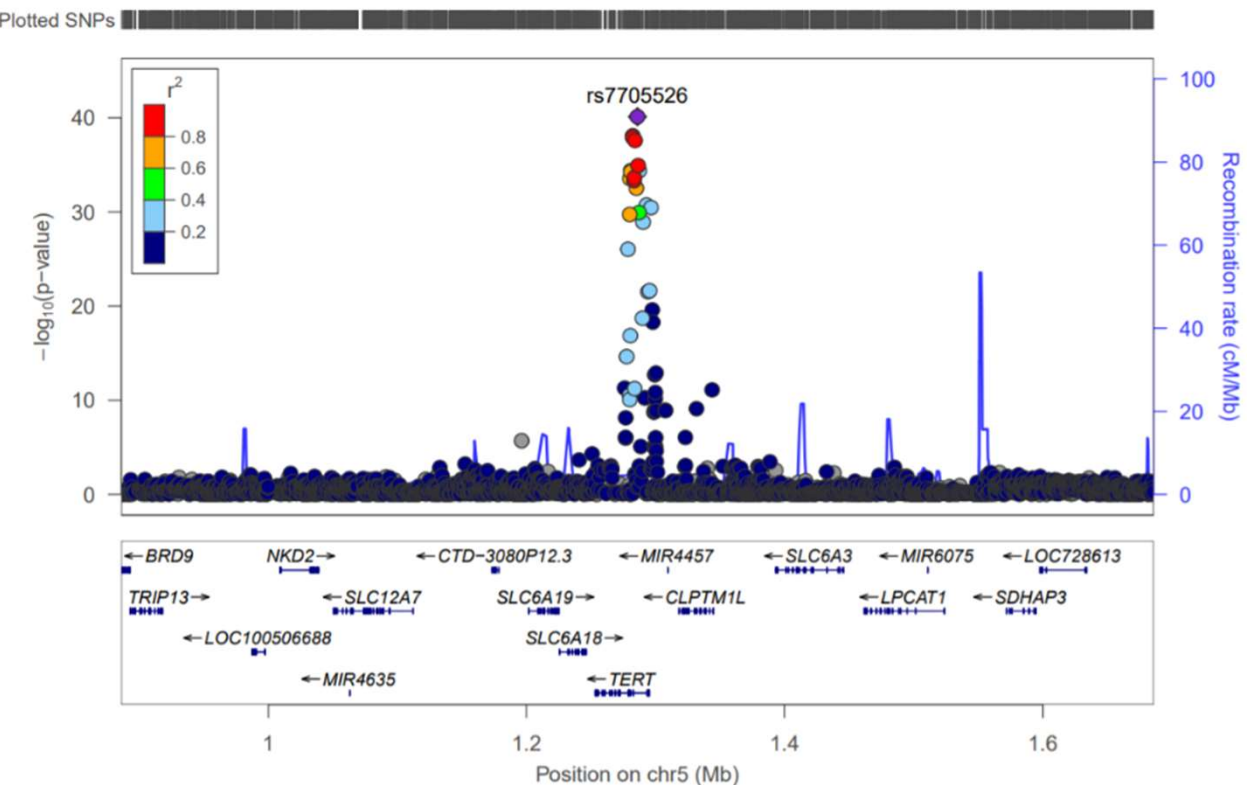

1. Dorajoo, R., X. Chang, R.L. Gurung, et al., *Loci for human leukocyte telomere length in the Singaporean Chinese population and trans-ethnic genetic studies*. Nature communications, 2019. **10**(1): p. 2491 DOI: 10.1038/s41467-019-10443-2.

**Supplementary Figure 3.** Regional common SNP associations at loci reported the same index SNP [1]. **a.** *TERT* (rs7705526, chr5) **b.** *TINF2* (rs41293836, chr14) and **c.** *RTEL1* (rs41309367, chr20). Plots plotted using LocusZoom (<http://csg.sph.umich.edu/locuszoom/>).

**b**

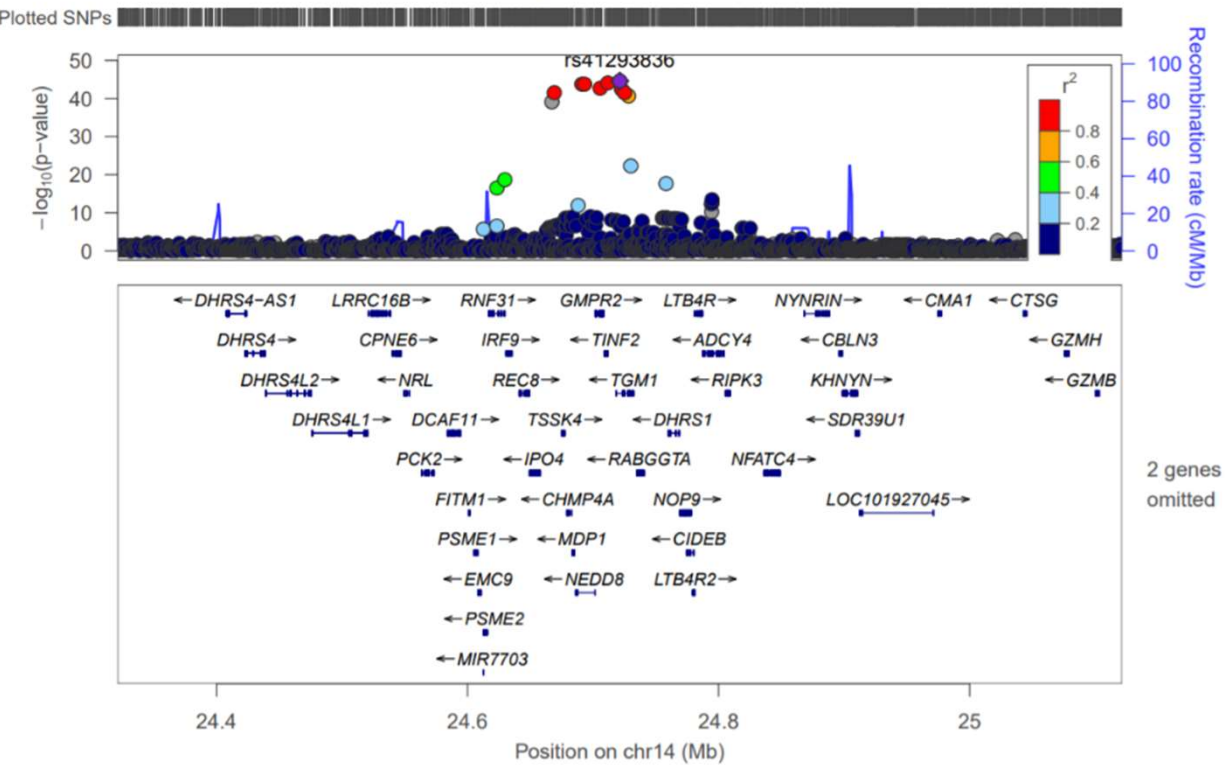

1. Dorajoo, R., X. Chang, R.L. Gurung, et al., *Loci for human leukocyte telomere length in the Singaporean Chinese population and trans-ethnic genetic studies*. Nature communications, 2019. **10**(1): p. 2491 DOI: 10.1038/s41467-019-10443-2.



**Supplementary Figure 3.** Regional common SNP associations at loci reported the same index SNP [1]. **a.** *TERT* (rs7705526, chr5) **b.** *TINF2* (rs41293836, chr14) and **c.** *RTEL1* (rs41309367, chr20). Plots plotted using LocusZoom (<http://csg.sph.umich.edu/locuszoom/>).

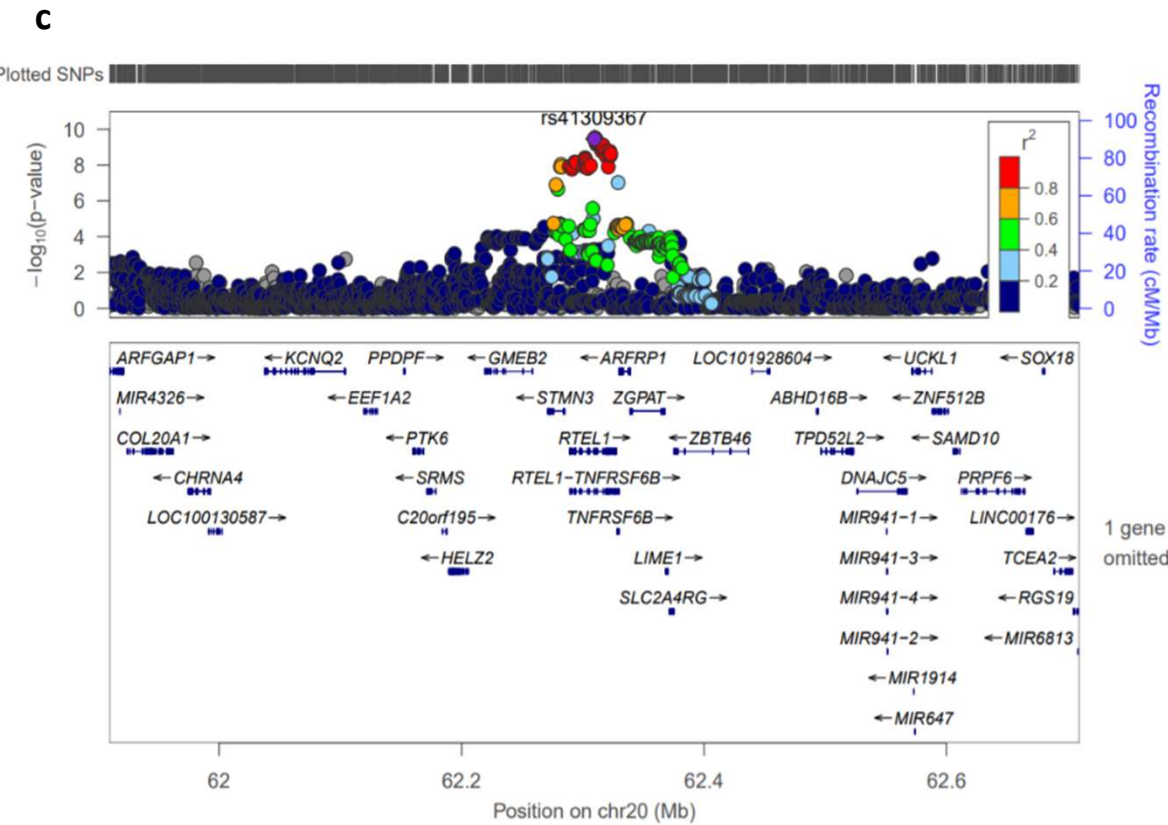

1. Dorajoo, R., X. Chang, R.L. Gurung, et al., *Loci for human leukocyte telomere length in the Singaporean Chinese population and trans-ethnic genetic studies*. Nature communications, 2019. **10**(1): p. 2491 DOI: 10.1038/s41467-019-10443-2.

**Supplementary Figure 4.** Regional common SNP associations at loci identified new common SNPs in linkage disequilibrium with previous reported index SNPs [1]. **a.** *PARP1* (rs3219104, chr1) **b.** *TERC* (rs2293607, chr3) **c.** *NAF1* (rs10857352, chr4) **d.** *TERF1* (rs28365964, chr8) **e.** *OBFC1* (rs12415148, chr10) and **f.** *ATM* (rs227080, chr11). Plots plotted using LocusZoom (<http://csg.sph.umich.edu/locuszoom/>). Previous index SNPs were indicated as purple diamond. New index SNPs were circled and indicated in green.

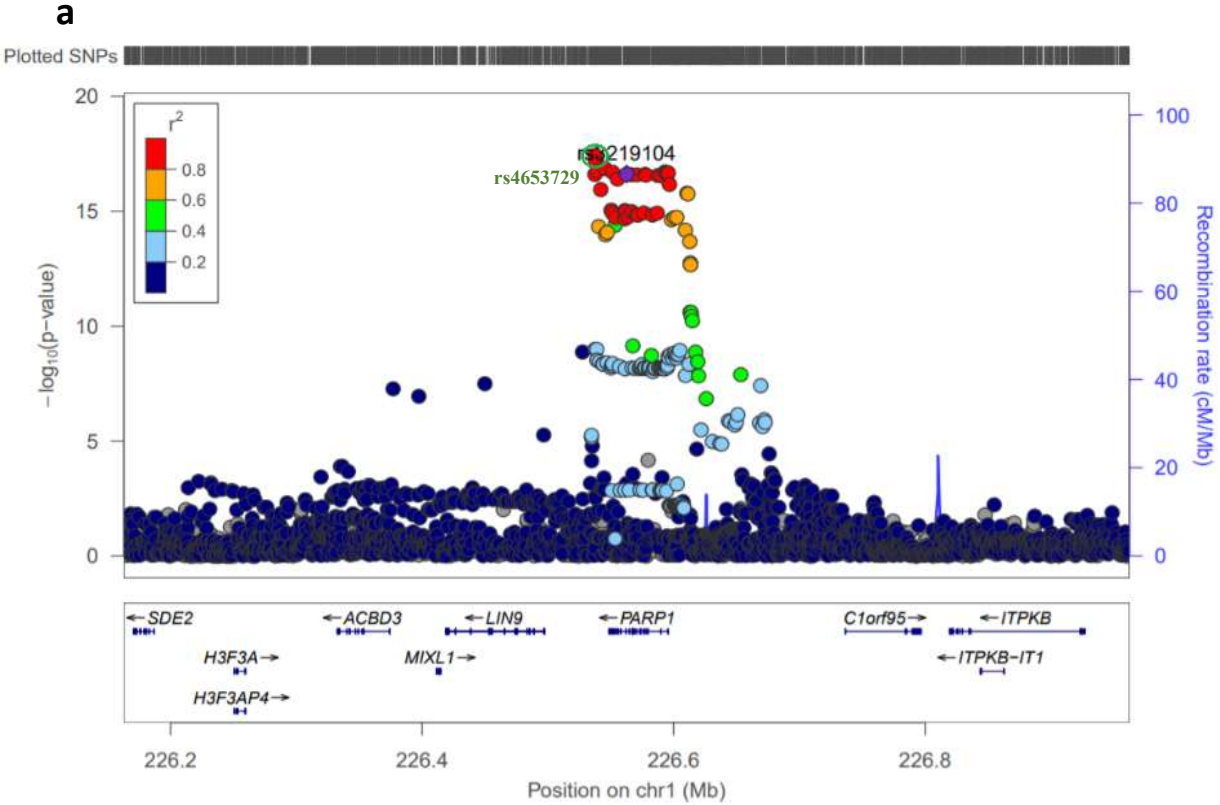

1. Dorajoo, R., X. Chang, R.L. Gurung, et al., *Loci for human leukocyte telomere length in the Singaporean Chinese population and trans-ethnic genetic studies.* Nature communications, 2019. **10**(1): p. 2491 DOI: 10.1038/s41467-019-10443-2.



**Supplementary Figure 4.** Regional common SNP associations at loci identified new common SNPs in linkage disequilibrium with previous reported index SNPs [1]. **a.** *PARP1* (rs3219104, chr1) **b.** *TERC* (rs2293607, chr3) **c.** *NAF1* (rs10857352, chr4) **d.** *TERF1* (rs28365964, chr8) **e.** *OBFC1* (rs12415148, chr10) and **f.** *ATM* (rs227080, chr11). Plots plotted using LocusZoom (<http://csg.sph.umich.edu/locuszoom/>). Previous index SNPs were indicated as purple diamond. New index SNPs were circled and indicated in green.

**b**

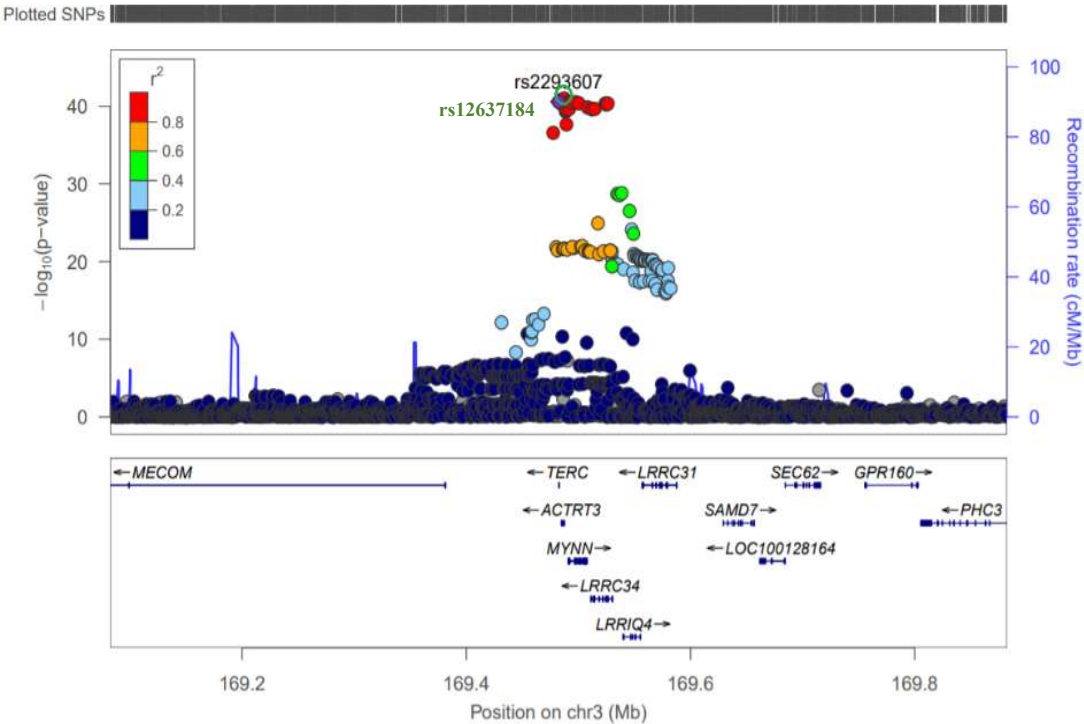

1. Dorajoo, R., X. Chang, R.L. Gurung, et al., *Loci for human leukocyte telomere length in the Singaporean Chinese population and trans-ethnic genetic studies*. Nature communications, 2019. **10**(1): p. 2491 DOI: 10.1038/s41467-019-10443-2.

**Supplementary Figure 4.** Regional common SNP associations at loci identified new common SNPs in linkage disequilibrium with previous reported index SNPs [1]. **a.** *PARP1* (rs3219104, chr1) **b.** *TERC* (rs2293607, chr3) **c.** *NAF1* (rs10857352, chr4) **d.** *TERF1* (rs28365964, chr8) **e.** *OBFC1* (rs12415148, chr10) and **f.** *ATM* (rs227080, chr11). Plots plotted using LocusZoom (<http://csg.sph.umich.edu/locuszoom/>). Previous index SNPs were indicated as purple diamond. New index SNPs were circled and indicated in green.

**c**

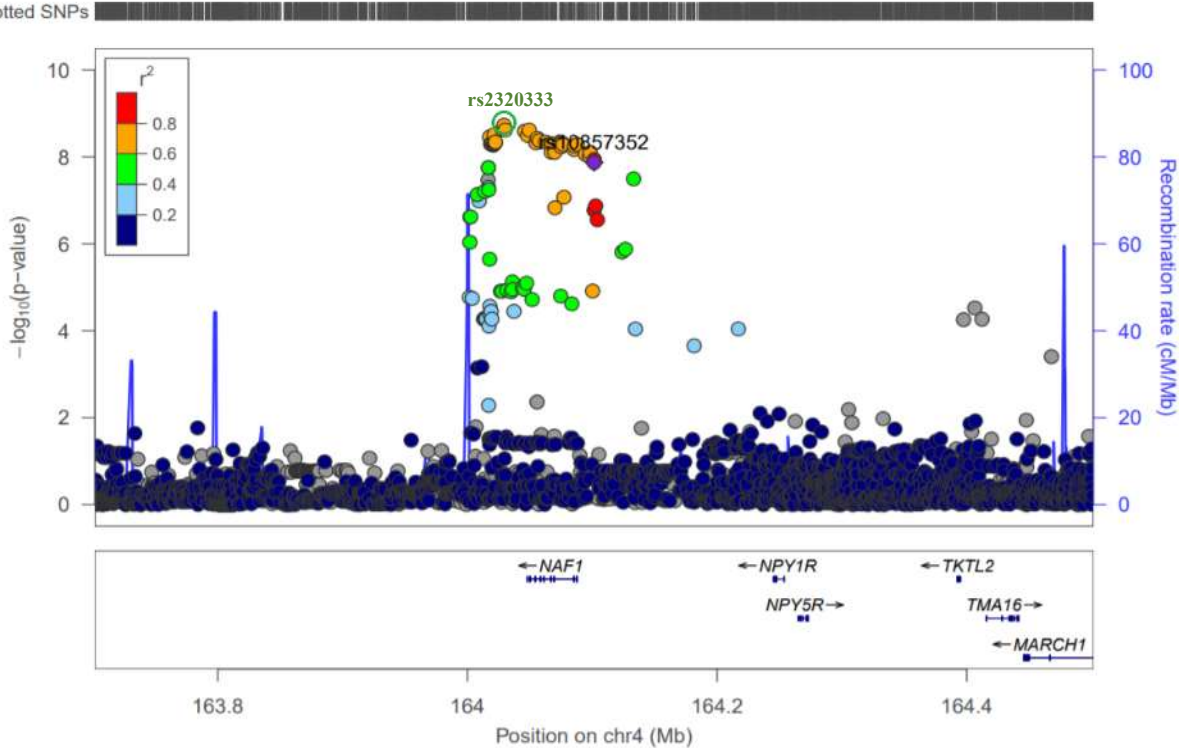

1. Dorajoo, R., X. Chang, R.L. Gurung, et al., *Loci for human leukocyte telomere length in the Singaporean Chinese population and trans-ethnic genetic studies*. Nature communications, 2019. **10**(1): p. 2491 DOI: 10.1038/s41467-019-10443-2.

**Supplementary Figure 4.** Regional common SNP associations at loci identified new common SNPs in linkage disequilibrium with previous reported index SNPs [1]. **a.** *PARP1* (rs3219104, chr1) **b.** *TERC* (rs2293607, chr3) **c.** *NAF1* (rs10857352, chr4) **d.** *TERF1* (rs28365964, chr8) **e.** *OBFC1* (rs12415148, chr10) and **f.** *ATM* (rs227080, chr11). Plots plotted using LocusZoom (<http://csg.sph.umich.edu/locuszoom/>). Previous index SNPs were indicated as purple diamond. New index SNPs were circled and indicated in green.

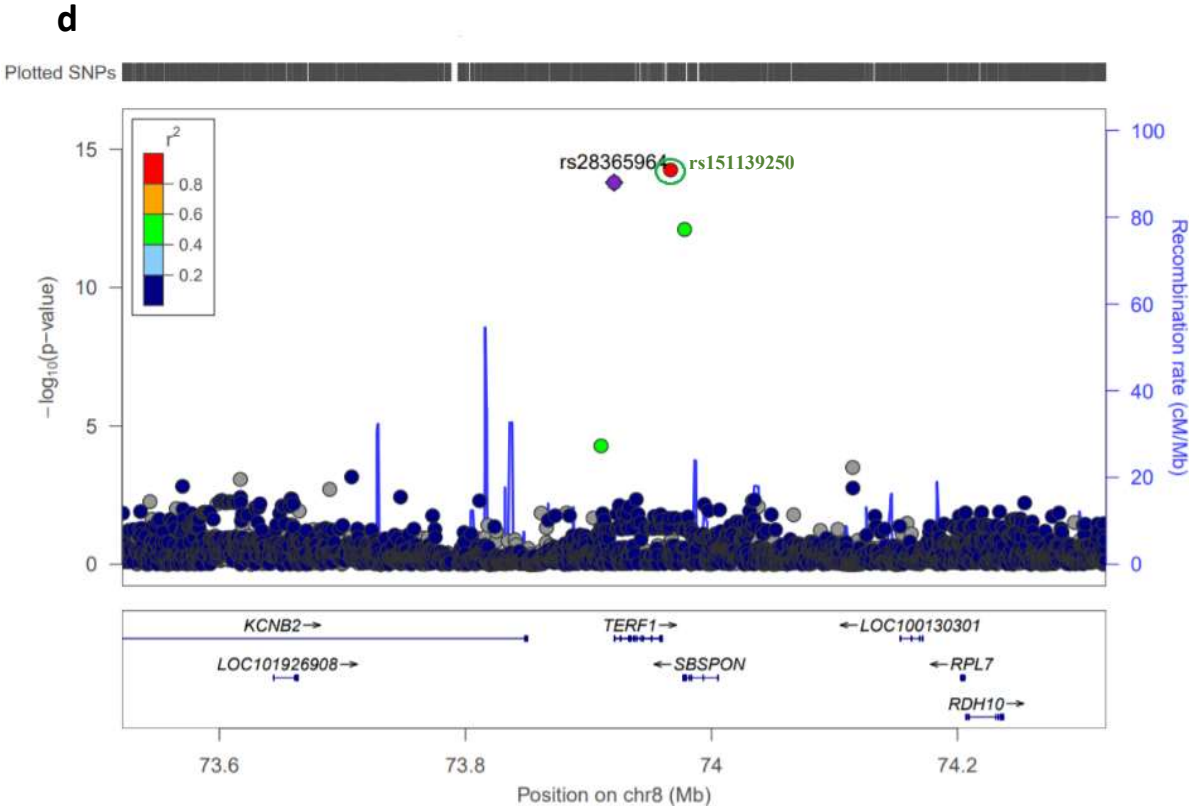

1. Dorajoo, R., X. Chang, R.L. Gurung, et al., *Loci for human leukocyte telomere length in the Singaporean Chinese population and trans-ethnic genetic studies*. Nature communications, 2019. **10**(1): p. 2491 DOI: 10.1038/s41467-019-10443-2.

**Supplementary Figure 4.** Regional common SNP associations at loci identified new common SNPs in linkage disequilibrium with previous reported index SNPs [1]. **a.** *PARP1* (rs3219104, chr1) **b.** *TERC* (rs2293607, chr3) **c.** *NAF1* (rs10857352, chr4) **d.** *TERF1* (rs28365964, chr8) **e.** *OBFC1* (rs12415148, chr10) and **f.** *ATM* (rs227080, chr11). Plots plotted using LocusZoom (<http://csg.sph.umich.edu/locuszoom/>). Previous index SNPs were indicated as purple diamond. New index SNPs were circled and indicated in green.

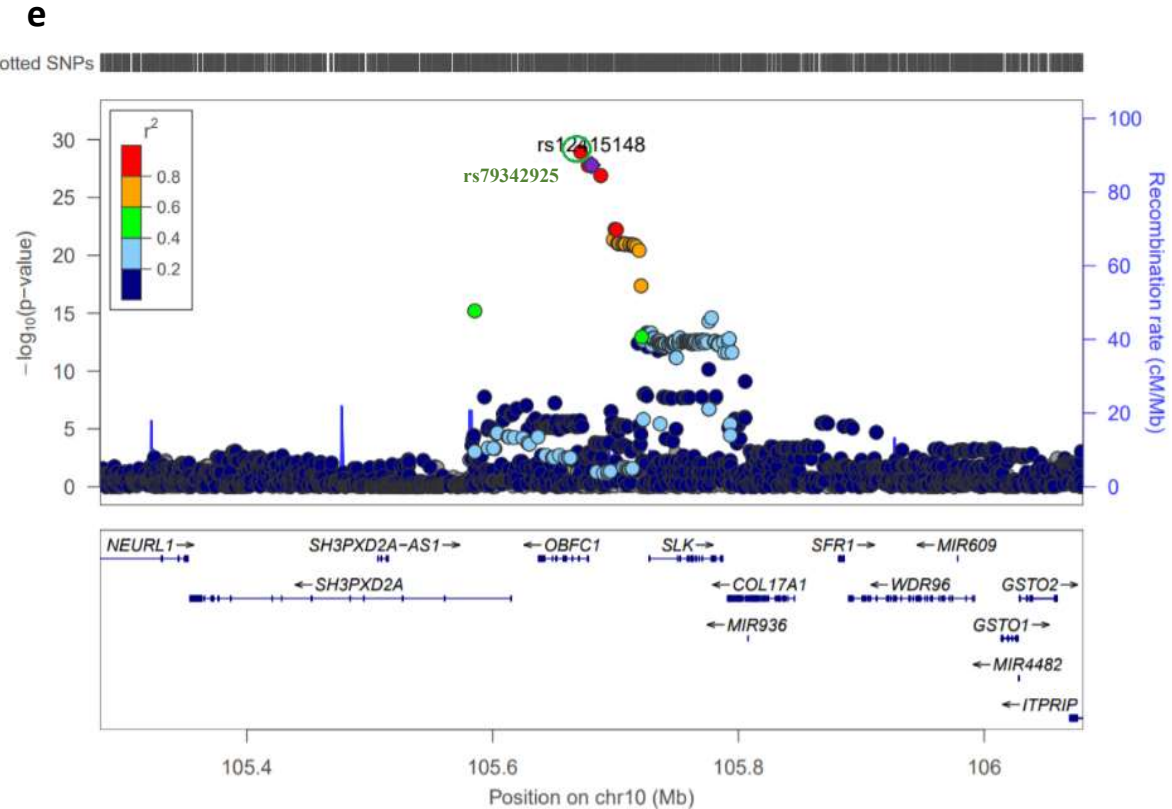

1. Dorajoo, R., X. Chang, R.L. Gurung, et al., *Loci for human leukocyte telomere length in the Singaporean Chinese population and trans-ethnic genetic studies*. Nature communications, 2019. **10**(1): p. 2491 DOI: 10.1038/s41467-019-10443-2.

**Supplementary Figure 4.** Regional common SNP associations at loci identified new common SNPs in linkage disequilibrium with previous reported index SNPs [1]. **a.** *PARP1* (rs3219104, chr1) **b.** *TERC* (rs2293607, chr3) **c.** *NAF1* (rs10857352, chr4) **d.** *TERF1* (rs28365964, chr8) **e.** *OBFC1* (rs12415148, chr10) and **f.** *ATM* (rs227080, chr11). Plots plotted using LocusZoom (<http://csg.sph.umich.edu/locuszoom/>). Previous index SNPs were indicated as purple diamond. New index SNPs were circled and indicated in green.

**f**

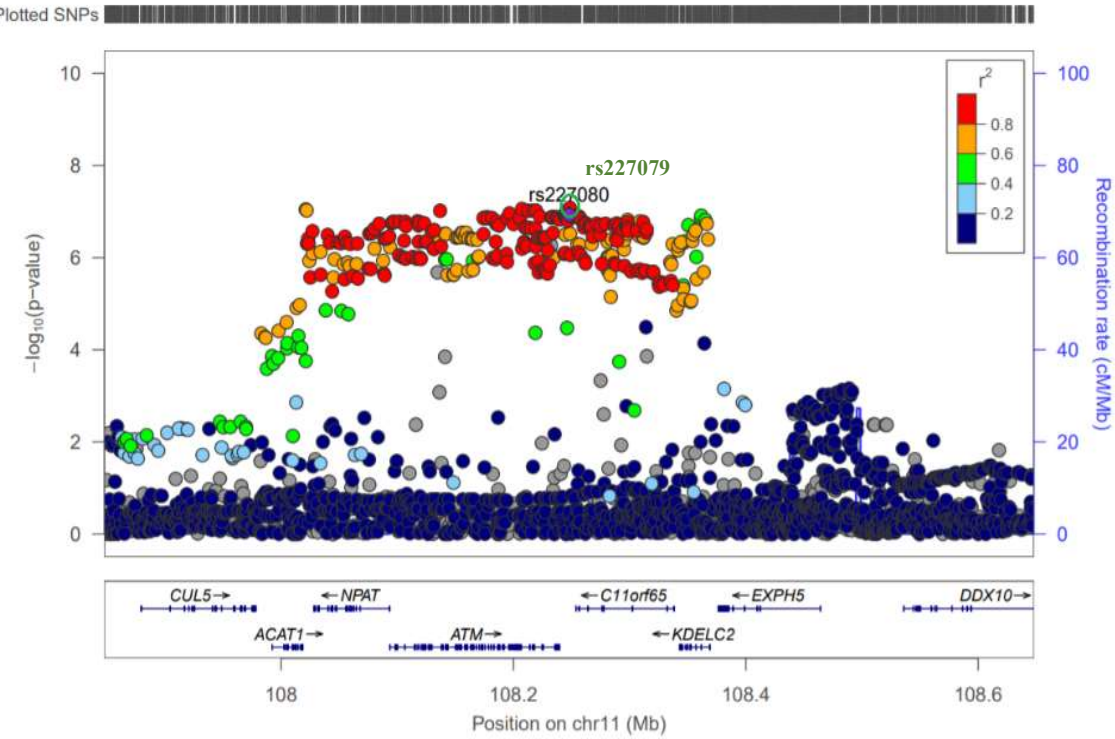

1. Dorajoo, R., X. Chang, R.L. Gurung, et al., *Loci for human leukocyte telomere length in the Singaporean Chinese population and trans-ethnic genetic studies*. Nature communications, 2019. **10**(1): p. 2491 DOI: 10.1038/s41467-019-10443-2.

**Supplementary Figure 5.** Regional SNP common associations at the *POT1* gene locus. **a.** Previous reported index SNP rs77767444 **b.** New index SNP rs34398311 **c.** rs34398311 condition on rs77767444. Plots plotted using LocusZoom (<http://csg.sph.umich.edu/locuszoom/>).

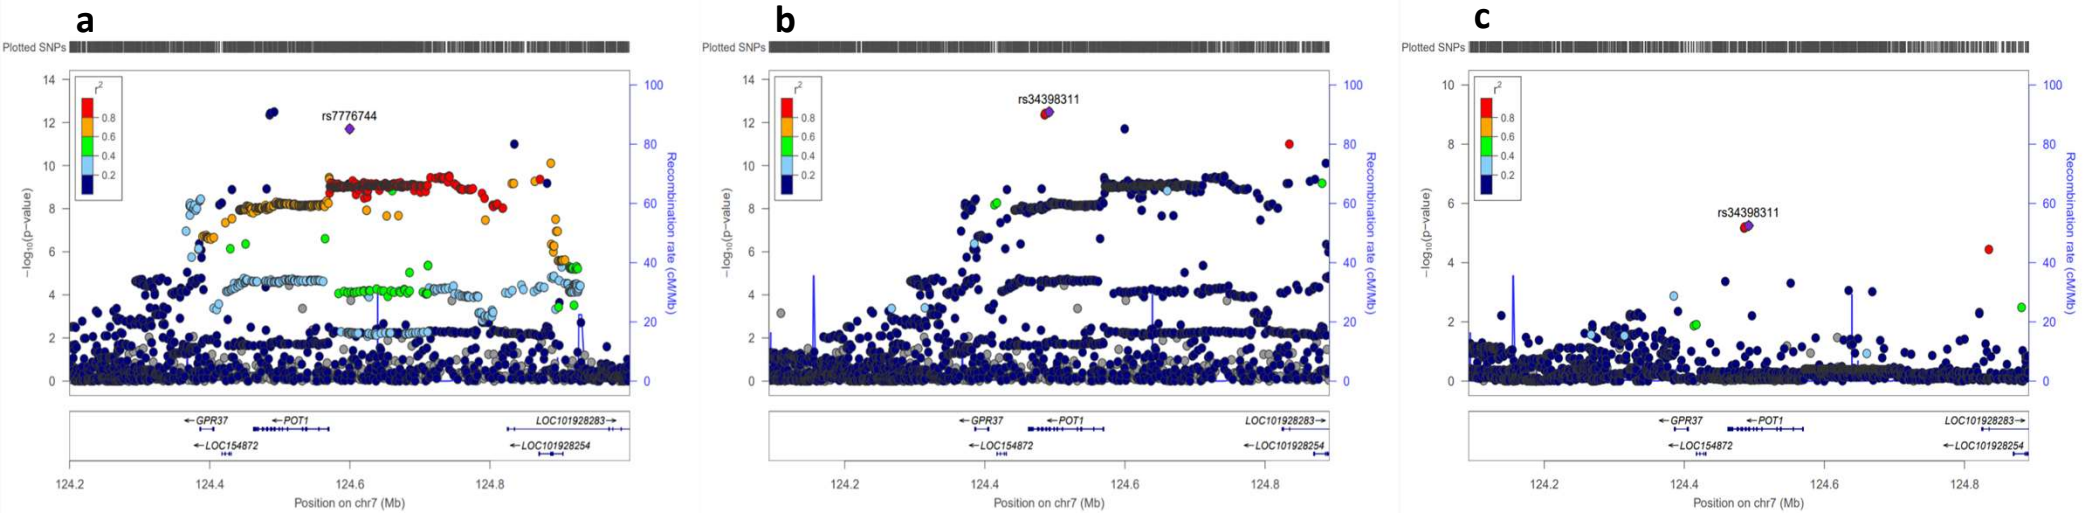



**Supplementary Figure 6.** Regional low frequency SNP common associations at the *POT1* gene locus. **a.** rs79314063 (genotyped missense variant, p.ASP410His) **b.** rs186524197 included in the association between LTL and rs79314063 as covariate. **c.** rs186524197 (imputed intergenic SNP) **d.** rs79314063 included in the association between LTL and rs186524197 as covariate. Plots plotted using LocusZoom (<http://csg.sph.umich.edu/locuszoom/>).

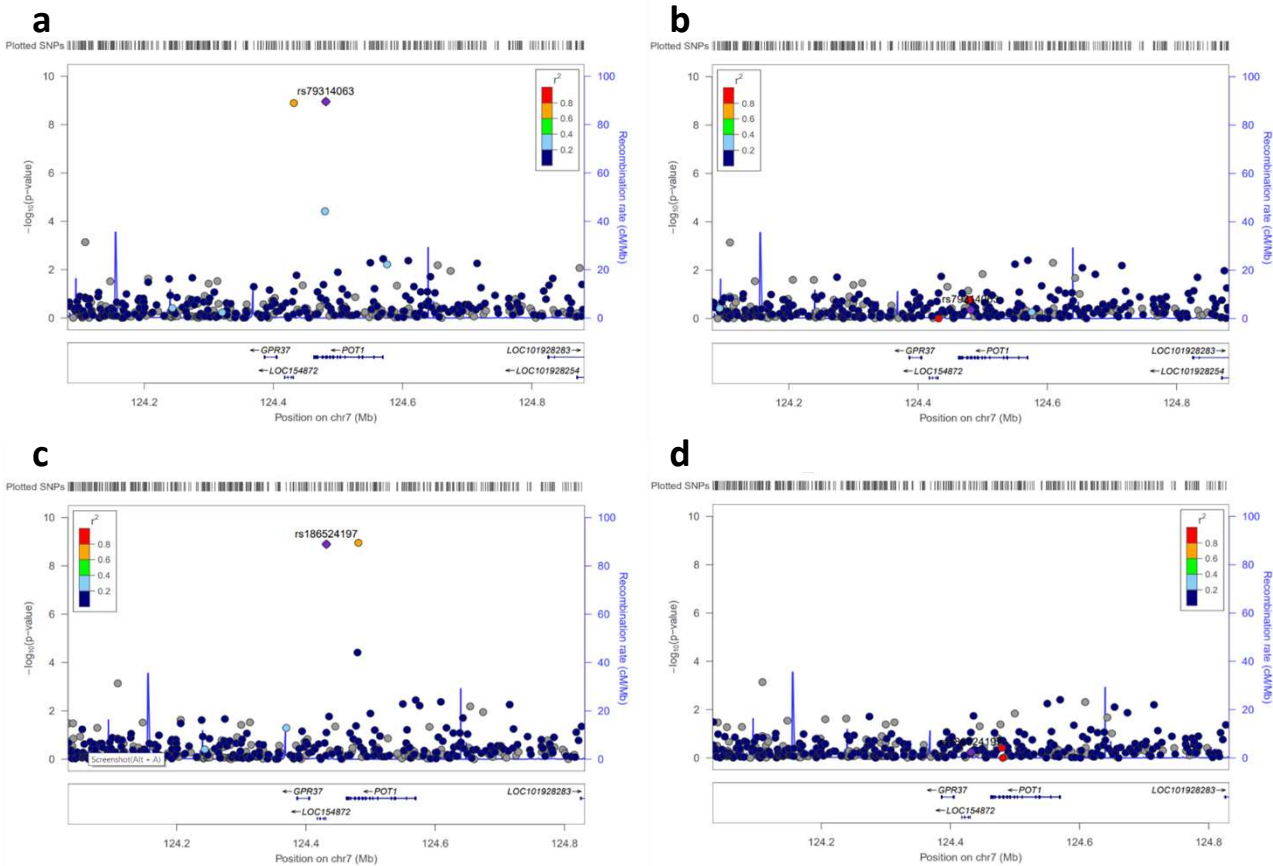

**Supplementary Figure 7.** 3D chromatin interaction mapping for rs79617270 (chromosome 8). **a.** Overall circos plot indicating 3 interactions at chromosome 8 with region containing rs79617270. **b.** Region 8:73960001-74000000 (indicated in red) contained rs79617270 and interacted with promoter regions of *TERF1* and *SBSPON* in blood lymphoblast cell line (GM12878, indicated in green). Diagrams plotted using FUMAGWAS (<https://fuma.ctglab.nl/>). Mapped genes were those where chromatin interaction loops overlap gene promoter regions (250 bp up- and 500 bp down-stream of TSS by default).

**a**

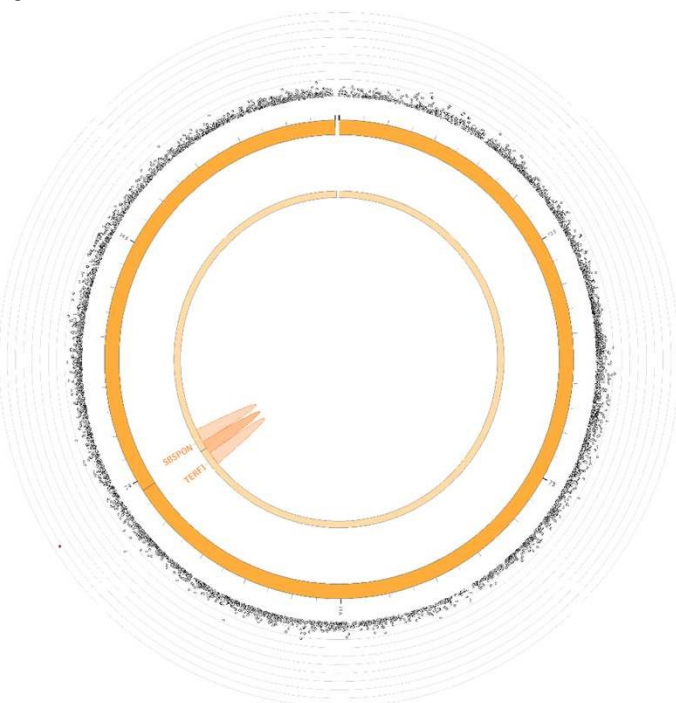

**b**

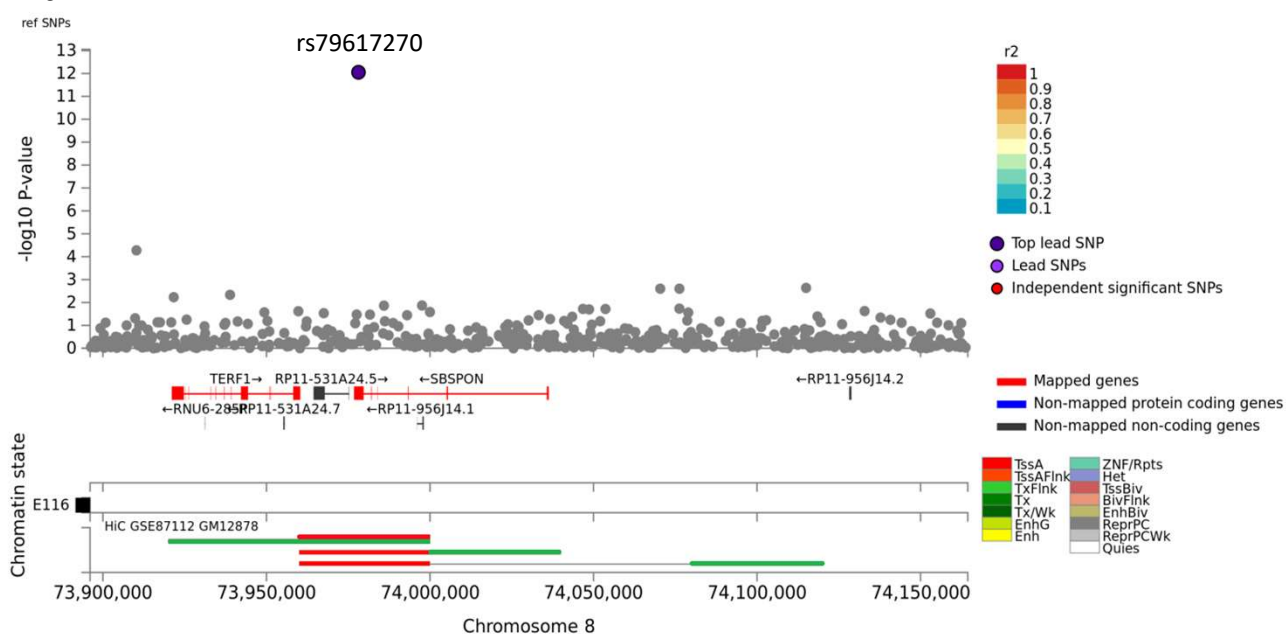



**Supplementary Figure 8.** 3D Chromatin Interaction mapping for rs139620151 (chromosome 10). **a.** Overall circo plot indicating 4 interactions at chromosome 10 with region containing rs139620151. **b.** Region 10:105560001-105600000 (indicated in green) contained rs139620151 and interacted with promoter elements of the proximal *STN1* (*OBFC1*) and *GSTO2* genes in lung fibroblast cells (IMR90, indicated in red). Diagrams plotted using FUMAGWAS (<https://fuma.ctglab.nl/>). Mapped genes were those where chromatin interaction loops overlap gene promoter regions (250 bp up- and 500 bp down-stream of TSS by default).

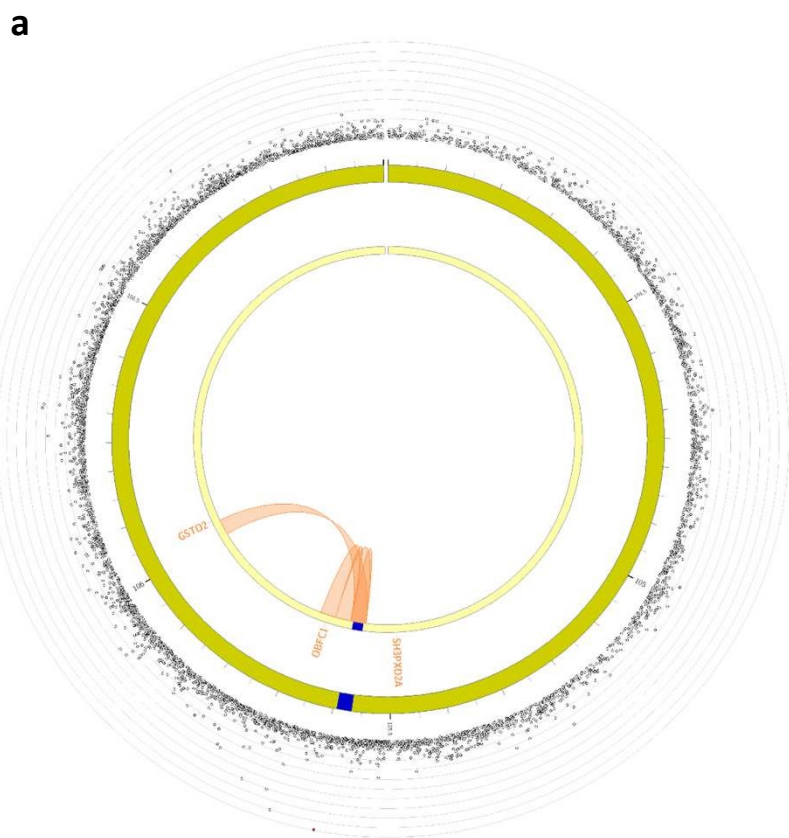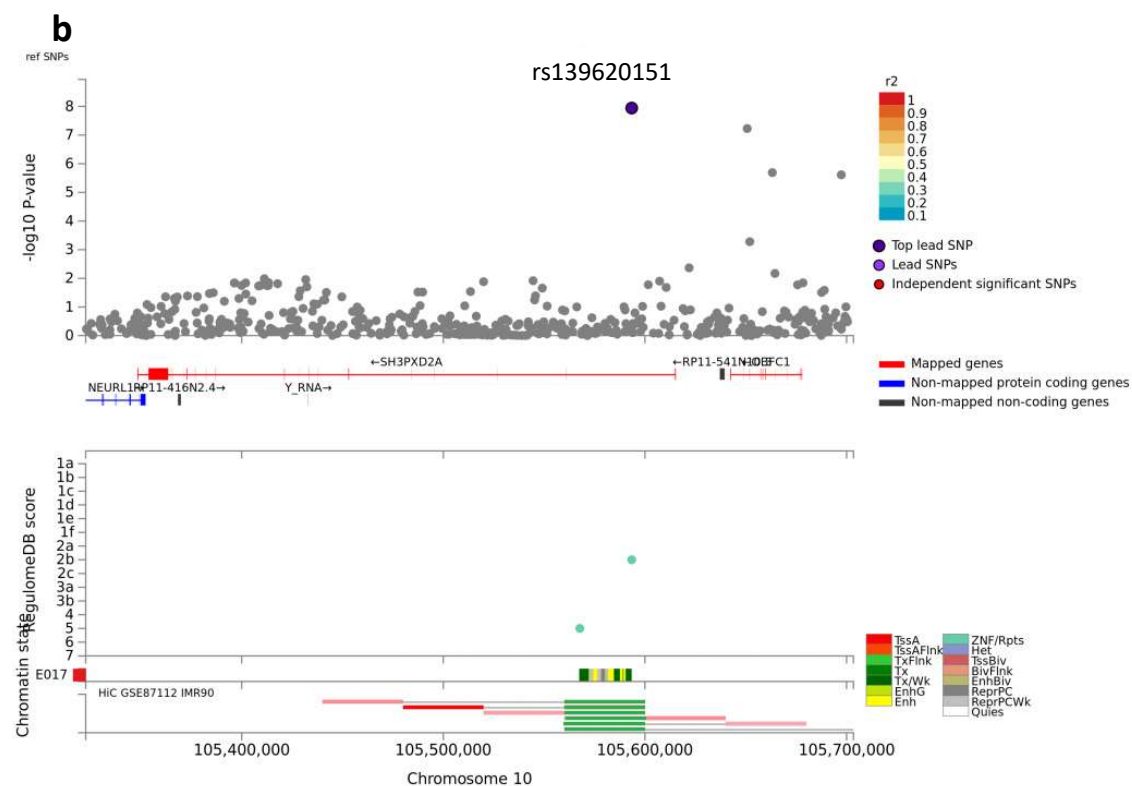

Supplement: 42003_2021_2056_MOESM1_ESM.pdf [file 42003_2021_2056_MOESM1_ESM.pdf]
